# Supplementary material for: Chemical constituents from Prunus persica leaves.
Source: Royal Society of Chemistry journal article supplement (doi:10.1039/d1sc07067c), 1990-01-01
Supplement: d1sc07067c1.pdf [file d1sc07067c1.pdf]

**Stereoretentive and Regioselective Selenium-catalyzed Intermolecular  
Propargylic C-H Amination of Alkynes**

**Supporting Information**

*T. Parker Maloney, Alexander F. Dohoda, Alec C. Zhu, and Forrest E.  
Michael\**

*Department of Chemistry, University of Washington, Seattle, Washington 98195-1700*

\*Correspondence to: michael@chem.washington.edu

|                                                                               |     |
|-------------------------------------------------------------------------------|-----|
| <i>General Experimental and Materials</i> .....                               | S3  |
| <i>Preparation of Alkyne Starting Materials</i> .....                         | S3  |
| <i>General Procedure and Characterization of Allylic Amine Products</i> ..... | S7  |
| <i>Intermolecular competition experiments</i> .....                           | S20 |
| <i>Stereochemistry Retention</i> .....                                        | S21 |
| <i>Kinetic Isotope Experiments</i> .....                                      | S23 |
| <i>DFT Calculations</i> .....                                                 | S23 |
| <i>References</i> .....                                                       | S50 |

### General Experimental and Materials:

All reactions were performed under a nitrogen atmosphere using oven-dried or flame-dried glassware unless otherwise indicated. Dichloromethane (CH<sub>2</sub>Cl<sub>2</sub>) and tetrahydrofuran (THF) were degassed and dried by passing through a column of activated neutral alumina. Deuterated solvents (CDCl<sub>3</sub>, acetone-*d*<sub>6</sub>) were obtained from Cambridge Isotope Laboratories, Inc. and stored over activated 3A molecular sieves. Ethyl acetate (EtOAc), hexanes, and diethylether (Et<sub>2</sub>O) were obtained from Fisher Scientific or Sigma Aldrich and used without further purification. All other reagents were purchased from Sigma Aldrich, Tokyo Chemical Industry, Fisher Scientific, Alfa Aesar, and Oakwood Chemical and used without further purification unless otherwise indicated. Infrared spectra were acquired using a Perkin Elmer Spectrum RX I spectrometer. Mass spectra were acquired using a Bruker Esquire 1100 Liquid Chromatograph-Ion Trap Mass Spectrometer. Column chromatography was performed using silica gel (Whatman, 60 Å, 230-400 mesh). NMR spectra were recorded on a Bruker AV-300, AV-301, DRX-499, or AV-500 spectrometer. <sup>1</sup>H NMR chemical shifts (δ) are reported in parts per million (ppm) and are referenced relative to Me<sub>4</sub>Si (0.00 ppm), CHCl<sub>3</sub> (7.26 ppm) or acetone-*d*<sub>5</sub> (2.06 ppm). <sup>13</sup>C NMR chemical shifts (δ) are reported in parts per million (ppm) relative to the carbon resonance of CDCl<sub>3</sub> (77.26 ppm) or acetone-*d*<sub>6</sub> (29.92 ppm). Melting points were taken on a MEL-TEMP melting point apparatus and are uncorrected. HPLC spectra were obtained on a Shimadzu LC-6AD with a SPD-20A UV/Vis-detector.

### Preparation of Alkyne Substrates:

#### **General Procedure A for alcohol protection:**

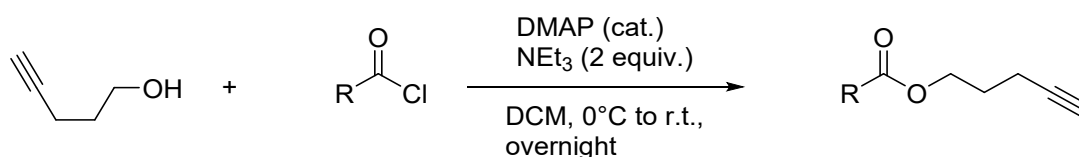

A flame-dried round-bottomed flask equipped with a magnetic stir bar was charged with 4-pentyn-1-ol (5 mmol, 1 equiv.) and 4-dimethylaminopyridine (0.1 mmol, 0.02 equiv.). Dry dichloromethane (10 mL, 0.5 M) was added and the reaction mixture was stirred and cooled to 0°C. Benzoyl chloride (5.5 mmol, 1.1 equiv.) was added to the reaction mixture followed by triethylamine (10 mmol, 2 equiv.). The mixture was then allowed to warm to room temperature and stir overnight. The reaction was quenched with water (20 mL) and diluted with ether (30 mL). The organic layer was then washed with saturated sodium bicarbonate (2 x 20 mL) and brine (1 x 20 mL) and dried over sodium sulfate. The solvent was then removed under reduced pressure and the crude products were purified by silica gel chromatography.

#### **General Procedure B for alcohol protection:**

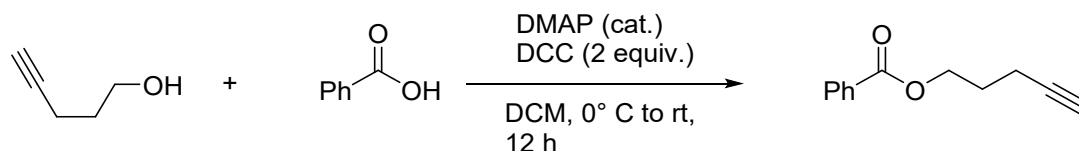

In a 200 ml round bottom flask, mixture of benzoic acid (5.5 mmol), 4-pentyn-1-ol (0.466 mL, 5.0 mmol), DCC (2.67 g, 11.00 mmol) dissolved in dry dichloromethane (50 mL), was stirred at 0 °C under an nitrogen atmosphere for 30 min. Then, a solution of 4-dimethylaminopyridine (0.49 g, 4.0 mmol) in dry dichloromethane (20 mL) was added and the mixture was stirred at 0 °C for 1 h and allowed to warm to room temperature and stirred 12 h. The mixture was filtered and the filtrate was washed with 0.5M HCl (2 x 50 mL), NaHCO<sub>3</sub> (2 x 50 mL), and brine (1 x 50 mL). The solvent was removed under reduced pressure and the crude product was purified by chromatography on a silica gel column.

**General Procedure C for alcohol protection:**

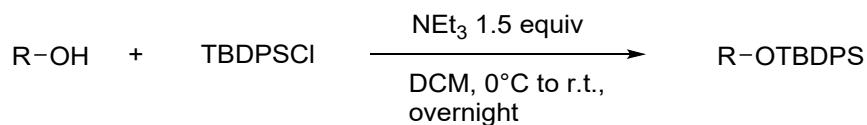

A flame-dried round-bottomed flask equipped with a magnetic stir bar was charged with a mixture of alcohol (1 equiv) and triethylamine (1.5 equiv) dissolved in dry dichloromethane (0.25 M), then was stirred at 0 °C under a nitrogen atmosphere for 10 min. TBDPSCI (1.2 equiv) was added dropwise and the mixture was stirred at 0 °C for 1 h then allowed to warm to room temperature. The reaction was monitored by TLC until starting alcohol was consumed. After that, the mixture was washed with 0.5M HCl (2 x 25 mL), NaHCO<sub>3</sub> (2 x 25 mL), and brine (1 x 25 mL). The solvent was removed under reduced pressure and the crude product was purified by chromatography on a silica gel column.

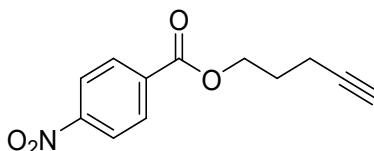

Pent-4-ynyl 4-nitrobenzoate (**1e**): Prepared according to general procedure A using 5 mmol of 4-pentyn-1-ol. Purified by silica gel chromatography (80:20, hexanes/ethyl acetate) to afford the product as a clear liquid (1.000 g, 85%).

<sup>1</sup>H NMR (500 MHz, CDCl<sub>3</sub>) δ 8.33 (d, *J* = 9.0 Hz, 2H), 8.22 (d, *J* = 9.0 Hz, 2H), 4.49 (t, *J* = 6.0 Hz, 2H), 2.40 (td, *J* = 6.5, 3.0 Hz, 2H), 2.03 (quin, *J* = 6.5 Hz, 2H) 2.00 (t, *J* = 2.5 Hz, 1H)

<sup>13</sup>C NMR (126 MHz, CDCl<sub>3</sub>) δ 164.69, 150.65, 135.67, 130.83, 123.61, 82.81, 69.43, 64.56, 27.57, 15.44.

IR (thin film): 3263, 1719, 1598, 1517, 1344, 1274, 1121, 1022, 877, 852, 825, 784, 717 cm<sup>-1</sup>

MS (ESI positive mode): *m/z* 256.1 [M+Na]<sup>+</sup>

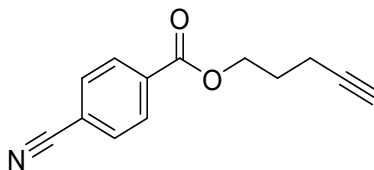

Pent-4-ynyl 4-cyanobenzoate (**1f**): Prepared according to general procedure B using 5.5 mmol of 4-pentyn-1-ol. Purified by silica gel chromatography (80:20, hexanes/ethyl acetate) to afford the product as a white solid (823 mg, 77%).

<sup>1</sup>H NMR (500 MHz, CDCl<sub>3</sub>) δ 8.14 (d, *J* = 8.0 Hz, 2H), 7.75 (d, *J* = 8.0 Hz, 2H), 4.47 (t, 6.5 Hz, 2H), 2.38 (td, *J* = 7.0, 3.0 Hz, 2H), 2.01 (quin, *J* = 7.0 Hz, 2H), 1.99 (t, *J* = 2.0 Hz, 1H)

<sup>13</sup>C NMR (126 MHz, CDCl<sub>3</sub>) δ 164.84, 134.02, 132.21, 130.01, 117.97, 116.43, 82.77, 69.37, 64.33, 27.50, 15.35.

IR (thin film): 3284, 3061, 2962, 2853, 2118, 1718, 1687, 1573, 1502, 1406, 1358, 1275, 1178, 1121, 1017, 959, 860, 769, 696 cm<sup>-1</sup>

MS (ESI positive mode): *m/z* 236.4 [M+Na]<sup>+</sup>

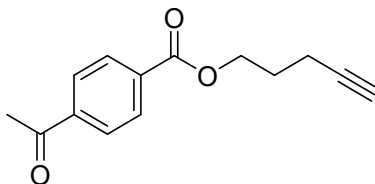

Pent-4-ynyl 4-acetylbenzoate (**1i**): Prepared according to general procedure B using 5.0 mmol of 4-pentyn-1-ol. Purified by silica gel chromatography (80:20, hexanes/ethyl acetate) to afford the product as a white solid (937 mg, 81%).

<sup>1</sup>H NMR (500 MHz, CDCl<sub>3</sub>) δ 8.00 (d, *J* = 9.0 Hz, 2H), 7.89 (d, *J* = 9.0 Hz, 2H), 4.34 (t, *J* = 6.0 Hz, 2H), 2.53 (s, 3H), 2.28 (td, *J* = 7.0, 2.5 Hz, 2H), 1.94 (t, *J* = 3.0 Hz, 1H), 1.91 (quin, *J* = 7.0 Hz, 2H)

<sup>13</sup>C NMR (126 MHz, CDCl<sub>3</sub>) δ 197.21, 165.38, 140.10, 133.79, 129.64, 128.05, 82.80, 69.25, 63.83, 27.46, 26.68, 15.21.

IR (thin film): 3260, 2967, 1956, 1714, 1683, 1574, 1501, 1405, 1358, 1277, 1123, 1018, 958, 856, 768, 743, 694, 612 cm<sup>-1</sup>.

MS (ESI positive mode): *m/z* 253.2 [M+Na]<sup>+</sup>

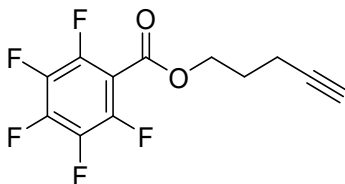

Pent-4-ynyl 2,3,4,5,6-pentafluorobenzoate (**1n**): Prepared according to general procedure A using 5 mmol of the 4-pentyn-1-ol. Purified by silica gel chromatography (80:20, hexanes/ethyl acetate) to afford the product as a clear liquid (1.187 g, 85%).

<sup>1</sup>H NMR (500 MHz, CDCl<sub>3</sub>) δ 4.46 (t, *J* = 6.0 Hz, 2H), 2.33 (td, *J* = 7.0, 2.5 Hz, 2H), 1.95 (t, *J* = 3.0 Hz, 1H), 1.95 (quint, *J* = 7.0 Hz, 2H).

<sup>13</sup>C NMR (126 MHz, CDCl<sub>3</sub>) δ 158.85, 145.38 (d, *J* = 263 Hz), 143.25 (d, *J* = 272 Hz), 137.69 (d, *J* = 255 Hz), 108.17, 82.34, 77.02, 69.20, 65.13, 27.24, 14.95.

IR (thin film): 3307, 2966, 2120, 1741, 1652, 1525, 1422, 1388, 1328, 1230, 1107, 1003, 953, 813, 763, 644 cm<sup>-1</sup>.

MS (ESI positive mode): *m/z* 301.4 [M+Na]<sup>+</sup>

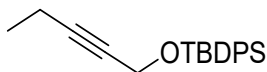

*t*-Butyl(pent-2-ynyloxy)diphenylsilane (**5c**): Prepared according to general procedure C for alcohol protection using 6.5 mmol of 2-pentyn-1-ol. Purified by silica gel chromatography (95:5, hexanes/ethyl acetate) to afford the product as a clear liquid (1.61 g, 76%).

<sup>1</sup>H NMR (500 MHz, CDCl<sub>3</sub>) δ 7.83 (m, 4H), 7.47 (m, 6H), 4.42 (m, 2H), 2.25 (q, *J* = 7.5, 2.0 Hz, 2H), 1.18 (m, 12H)

<sup>13</sup>C NMR (126 MHz, CDCl<sub>3</sub>) δ 135.66, 133.47, 129.68, 127.62, 87.17, 77.83, 53.04, 26.81, 19.23, 13.78, 12.52.

IR (thin film): 3070, 3048, 2958, 2931, 2857, 2234, 1589, 1461, 1373, 1318, 1261, 1188, 1110, 1075, 998, 822, 702, 611 cm<sup>-1</sup>.

MS (ESI positive mode): *m/z* 345.3 [M+Na]<sup>+</sup>

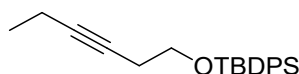

*t*-Butyl(hex-3-ynoxy)diphenylsilane (**5d**): Prepared according to general procedure for alcohol protection using 6.0 mmol of 3-hexyn-1-ol. Purified by silica gel chromatography (95:5, hexanes/ethyl acetate) to afford the product as a clear liquid (1.510 g, 74%).

<sup>1</sup>H NMR (500 MHz, CDCl<sub>3</sub>) δ 7.72 (m, 4H), 7.41 (m, 6H), 3.78 (t, *J* = 7.0 Hz, 2H), 2.46 (tt, *J* = 7.0, 2.5 Hz, 2H), 2.17 (qt, *J* = 7.5, 2.5 Hz, 2H), 1.13 (t, 3H), 1.09 (s, 9H)

<sup>13</sup>C NMR (126 MHz, CDCl<sub>3</sub>) δ 135.76, 134.02, 129.79, 127.81, 83.07, 76.50, 63.18, 27.02, 23.15, 19.46, 14.41, 12.64.

IR (thin film): 3069, 2931, 2856, 1959, 1889, 1825, 1589, 1462, 1427, 1387, 1360, 1263, 1188, 1109, 998, 917, 823, 738, 702, 613, 506 cm<sup>-1</sup>.

MS (ESI positive mode): *m/z* 359.3 [M+Na]<sup>+</sup>

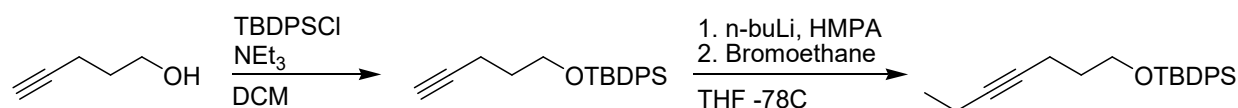

*t*-Butyl(hept-4-ynoxy)diphenylsilane (**5e**): Silyl ether intermediate was prepared by general procedure for alcohol protection using 5.0 mmol of the 4-pentyn-1-ol. Purified by silica gel chromatography (95:5, hexanes/ethyl acetate) to afford the product as a clear liquid (1.001 g, 72%). This protected alcohol was added to a flame-dried round-bottomed flask equipped with a magnetic stir bar, which was then charged with HMPA (1 equiv) dissolved in dry THF (0.25 M) and was cooled at -78 °C under a nitrogen atmosphere. *n*-BuLi (2.1 ml, 2.5 M) was added dropwise and the reaction was allowed to warm to room temperature and then stirred for 20 minutes. The mixture was cooled to -78 °C and bromoethane was added dropwise. The reaction was allowed to warm to room temperature and stirred overnight. The reaction was quenched slowly with water and extracted with CH<sub>2</sub>Cl<sub>2</sub>, then washed with water (2 x 25 ml), and brine (1 x 25 ml). The solution was dried over Na<sub>2</sub>SO<sub>4</sub> and the solvent removed under reduced pressure to give the crude alkyne. This was purified by silica gel chromatography (95:5, hexanes/ethyl acetate) to afford the product as a clear liquid (1.260 g, 72%).

<sup>1</sup>H NMR (500 MHz, CDCl<sub>3</sub>) δ 7.72 (m, 4H), 7.43 (m, 6H), 3.78 (t, *J* = 7.0 Hz, 2H), 2.46 (tt, *J* = 7.0, 2.0 Hz, 2H), 2.17 (qt, *J* = 7.5, 2.0 Hz, 2H), 1.13 (t, 3H), 1.09 (s, 9H)

<sup>13</sup>C NMR (126 MHz, CDCl<sub>3</sub>) δ 135.76, 134.02, 129.79, 127.81, 83.07, 76.50, 63.18, 27.02, 23.15, 19.46, 14.41, 12.64.

IR (thin film): 3071, 2932, 2858, 1969, 1889, 1823, 1678, 1589, 1472, 1428, 1389, 1361, 1322, 1189, 1109, 979, 823, 739, 702, 613 cm<sup>-1</sup>.

MS (ESI positive mode): *m/z* 373.4 [M+Na]<sup>+</sup>

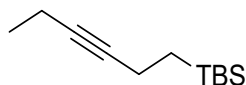

*t*-Butyl(4-hexyn-1-yl)dimethylsilane (**5l**): 1-Iodo-3-hexyne (832 mg, 4.0 mmol) was dissolved in dry ether (20 mL) and was cooled at -78 °C under a nitrogen atmosphere. *t*-BuLi (5.2 mL, 1.7 M, 2.2 equiv) was added dropwise and the reaction was allowed to warm to room temperature and stirred for 30 min. The mixture was cooled back down to -78 °C and TBSCl (2.4 g, 16 mmol, 4 equiv) in 10ml of ether was added dropwise. The mixture was allowed to warm to room temperature and stirred overnight. The reaction was quenched slowly with water and extracted with 2 times with ether. The organic extracts were

then washed with water (2x) and brine (1x), dried over Na<sub>2</sub>SO<sub>4</sub> and the solvent was removed under reduced pressure to give the crude product. This was purified by silica gel chromatography (95:5, hexanes/ethyl acetate) to afford the product as a clear liquid (255 mg, 65%).

**<sup>1</sup>H NMR** (500 MHz, CDCl<sub>3</sub>) δ 2.20 (m, 4H), 1.09 (t, *J* = 7.5 Hz, 3H), 0.85 (s, 9H), 0.78 (m, 2H), -0.05 (s, 6H)

**<sup>13</sup>C NMR** (126 MHz, CDCl<sub>3</sub>) δ 81.75, 80.91, 26.46, 16.46, 14.28, 13.59, 12.56, 12.41, -6.37.

**IR** (thin film): 2954, 2884, 2857, 1905, 1711, 1594, 1469, 1362, 1254, 1169, 1051, 1006, 937 834cm<sup>-1</sup>.

**MS** (ESI positive mode): *m/z* 219.2 [M+Na]<sup>+</sup>

**General Procedure for Propargyl Amination:**

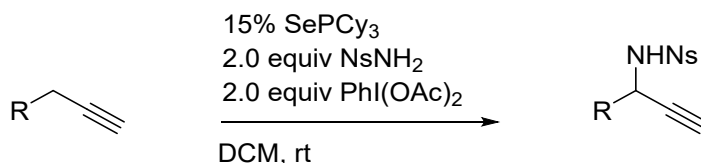

A flame-dried borosilicate glass vial equipped with a magnetic stir bar was charged with SePCy<sub>3</sub> (0.03 mmol, 0.15 equiv.), amine (0.4 mmol, 2 equiv.), and alkyne (0.2 mmol, 1.0 equiv.). The vial was thoroughly flushed with nitrogen and capped with a Teflon-lined screw cap. Dry dioxane (1 mL, 0.2 M) was added, followed by iodobenzene diacetate (0.4 mmol, 2 equiv.). The solution was stirred at the specified temperature and the reaction was monitored by TLC. Upon completion, an equal volume of ethyl acetate was added to the reaction and the mixture was flushed through a silica gel plug with ethyl acetate. The eluent was then concentrated on a rotary evaporator to afford the crude reaction product, which was then purified by column chromatography.

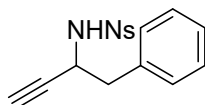

**4a:** Prepared according to standard amination conditions. Purified by silica gel chromatography (85:15 hexanes/ethyl acetate) to afford the product as a white solid (54.9 mg, 83%)

**<sup>1</sup>H NMR** (500 MHz, DMSO-*d*<sub>6</sub>) δ 8.71 (d, *J* = 8.5 Hz, 1H), 8.32 (d, *J* = 9.0 Hz, 2H), 7.94 (d, *J* = 9.0 Hz, 2H), 7.24–7.16 (m, 5H), 4.21 (dq, *J* = 2.0, 8.0 Hz, 1H), 3.06 (d, *J* = 2.5 Hz, 1H), 2.91–2.84 (m, 2H).

**<sup>13</sup>C NMR** (126 MHz, DMSO-*d*<sub>6</sub>) δ 149.4, 146.6, 136.4, 129.4, 128.2, 128.1, 126.6, 124.2, 81.8, 75.6, 46.3, 41.5.

**IR** (thin film) 3430, 2916, 2857, 1636, 1527, 1347, 1162, 1090, 1053, 853, 738 cm<sup>-1</sup>

**MS** (ESI positive mode): *m/z* 353.5 [M+Na]<sup>+</sup>

**MP:** 164–165 °C

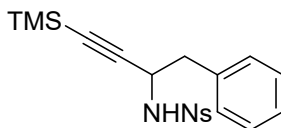

**4b:** Prepared according to standard amination conditions. Purified by silica gel chromatography (85:15 hexanes/ethyl acetate) to afford the product as a white solid (74.3 mg, 92%)

**<sup>1</sup>H NMR** (300 MHz, DMSO-*d*<sub>6</sub>) δ 8.65 (d, *J* = 9.0 Hz, 1H), 8.37 (d, *J* = 8.7 Hz, 2H), 7.99 (d, *J* = 8.7 Hz, 2H), 7.31–7.11 (m, 5H), 4.21 (q, *J* = 9.0 Hz, 1H), 2.98–2.72 (m, 2H), -0.13 (s, 9H).

**<sup>13</sup>C NMR** (126 MHz, DMSO-*d*<sub>6</sub>) δ 149.4, 146.7, 136.3, 129.5, 128.4, 127.9, 126.6, 124.2, 103.7, 88.8, 47.0, 41.5, -0.7.

**IR** (thin film): 3434, 3103, 2960, 2172, 1607, 1531, 1349, 1312, 1250, 1167, 1092, 844, 738 cm<sup>-1</sup>

**MS** (ESI positive mode): *m/z* 425.5 [M+Na]<sup>+</sup>

**MP:** 117-118 °C

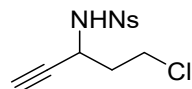

**4c:** Prepared according to standard amination conditions. Purified by silica gel chromatography (85:15 hexanes/ethyl acetate) to afford the product as a white solid (52.2 mg, 86%)

**<sup>1</sup>H NMR** (500 MHz, DMSO-*d*<sub>6</sub>) δ 8.72 (d, *J* = 9.0 Hz, 1H), 8.42 (d, *J* = 9.0 Hz, 2H), 8.07 (d, *J* = 8.5 Hz, 2H), 4.21 (qd, *J* = 7.0, 2.0 Hz, 1H), 3.69 – 3.61 (m, 2H), 3.13 (d, *J* = 2.0 Hz, 1H) 2.05 – 1.97 (m, 2H).

**<sup>13</sup>C NMR** (126 MHz, DMSO-*d*<sub>6</sub>) δ 149.6, 146.4, 128.4, 124.3, 80.5, 76.0, 42.4, 41.0, 38.1.

**IR** (Thin film) 3433, 2916, 2853, 1634, 1528, 1441, 1420, 1349, 1311, 1164, 1093, 1067, 968, 855, 739, 621, 553 cm<sup>-1</sup>

**MS** (ESI positive mode): [M+Na]<sup>+</sup> 325.6

**MP:** 155-156 °C

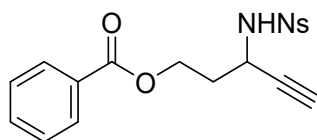

**4d:** Prepared according to standard amination conditions. Purified by silica gel chromatography (80:20 hexanes/ethyl acetate) to afford the product as a white solid (58.1 mg, 74%)

**<sup>1</sup>H NMR** (500 MHz, DMSO-*d*<sub>6</sub>) δ 8.76 (d, *J* = 8.5 Hz, 1H), 8.35 (d, *J* = 8.5 Hz, 2H), 8.05 (d, *J* = 8.5 Hz, 2H), 7.93 (d, *J* = 7.0 Hz, 2H), 7.66 (t, *J* = 7.5 Hz, 1H), 7.52 (t, *J* = 8.0 Hz, 2H), 4.29 – 4.21 (m, 3H), 3.14 (d, *J* = 2.0 Hz, 1H), 2.06 – 2.02 (m, 2H).

**<sup>13</sup>C NMR** (126 MHz, DMSO-*d*<sub>6</sub>) δ 165.5, 149.5, 146.4, 133.4, 129.4, 129.1, 128.7, 128.4, 124.3, 81.4, 75.5, 60.8, 42.0, 34.5.

**IR** (thin film) 3422, 3279, 2926, 2853, 1705, 1633, 1607, 1530, 1451, 1349, 1313, 1278, 1166, 1119, 1092, 855, 739, 714, 683, 619, 559 cm<sup>-1</sup>

**MS** (ESI positive mode): 411.5 [M+Na]<sup>+</sup>

**mp:** 183-185 °C

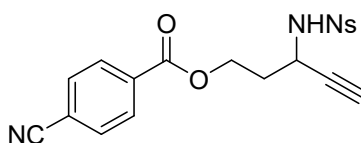



**4e:** Prepared according to standard amination conditions with  $\text{CH}_2\text{Cl}_2$  as solvent. Purified by silica gel chromatography (85:15, hexanes/ethyl acetate) to afford the product as a clear liquid (46 mg, 68%).

$^1\text{H NMR}$  (500 MHz,  $\text{DMSO-}d_6$ )  $\delta$  8.76 (d,  $J = 8.5$  Hz, 1H), 8.34 (d,  $J = 9.0$  Hz, 2H), 8.06 (m, 4H), 8.05 (d,  $J = 9.0$  Hz, 2H), 4.32 (m, 2H), 4.25 (m, 1H), 3.14 (d,  $J = 2.5$  Hz, 1H), 2.06 (m, 2H)

$^{13}\text{C NMR}$  (126 MHz,  $\text{DMSO-}d_6$ )  $\delta$  164.26, 149.46, 146.40, 133.34, 132.75, 129.83, 128.36, 124.30, 118.03, 115.51, 81.48, 75.41, 61.45, 41.96, 34.29.

**IR** (thin film): 3273, 3103, 2859, 1724, 1608, 1530, 1404, 1350, 1312, 1277, 1167, 1120, 1092, 1019, 856, 768, 738, 685, 663, 617  $\text{cm}^{-1}$ .

**MS** (ESI positive mode):  $m/z$  436.0  $[\text{M}+\text{Na}]^+$

**mp:** 137-140  $^\circ\text{C}$

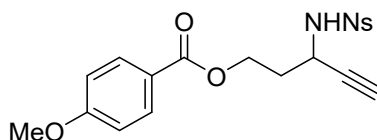

**4f:** Prepared according to standard amination conditions. Purified by silica gel chromatography (85:15 hexanes/ethyl acetate) to afford the product as a white solid (60.8 mg, 73%)

$^1\text{H NMR}$  (500 MHz,  $\text{DMSO-}d_6$ )  $\delta$  8.75 (d,  $J = 8.5$  Hz, 1H), 8.35 (d,  $J = 9.0$  Hz, 2H), 8.05 (d,  $J = 9.0$  Hz, 2H), 7.86 (d,  $J = 9.0$  Hz, 2H), 7.04 (d,  $J = 9.0$  Hz, 2H), 4.25 – 4.20 (m, 3H), 3.84 (s, 3H), 3.14 (d,  $J = 2.0$  Hz, 1H), 2.04 – 1.98 (m, 2H).

$^{13}\text{C NMR}$  (126 MHz,  $\text{DMSO-}d_6$ )  $\delta$  165.1, 163.2, 149.5, 146.4, 131.2, 128.3, 124.3, 121.6, 114.0, 81.4, 75.4, 60.4, 55.5, 42.0, 34.5.

**IR** (thin film) 3434, 2947, 2916, 2843, 1705, 1638, 1606, 1528, 1461, 1347, 1316, 1254, 1166, 1109, 1025, 849, 761, 735, 678, 610, 553  $\text{cm}^{-1}$

**MS** (ESI positive mode): 441.0  $[\text{M}+\text{Na}]^+$

**mp:** 168-169  $^\circ\text{C}$

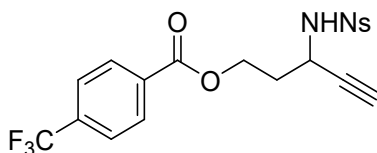

**4g:** Prepared according to standard amination conditions. Purified by silica gel chromatography (85:15 hexanes/ethyl acetate) to afford the product as a white solid (64.7 mg, 71%)

$^1\text{H NMR}$  (500 MHz,  $\text{DMSO-}d_6$ )  $\delta$  8.78 (d,  $J = 8.8$  Hz, 1H), 8.36 (d,  $J = 8.9$  Hz, 2H), 8.13 (d,  $J = 8.1$  Hz, 2H), 8.07 (d,  $J = 8.9$  Hz, 2H), 7.92 (d,  $J = 8.3$  Hz, 2H), 4.35 (t,  $J = 6.0$  Hz, 2H), 4.27 (td,  $J = 8.7, 2.2$  Hz, 1H), 3.17 (d,  $J = 2.3$  Hz, 1H), 2.15 – 2.02 (m, 2H).

$^{13}\text{C NMR}$  (126 MHz,  $\text{DMSO-}d_6$ )  $\delta$  165.1, 150.2, 147.1, 133.9, 133.6 (q,  $^2J_{\text{CF}} = 31.9$  Hz), 130.7, 129.1, 126.4, 125.0, 124.4 (q,  $^1J_{\text{CF}} = 272.9$  Hz), 82.2, 76.2, 62.1, 42.7, 35.0.

**IR** (thin film) 3434 2957, 2916, 1721, 1635, 1531, 1347, 1326, 1277, 1165, 1128, 854, 771, 739, 683, 621, 564  $\text{cm}^{-1}$

**MS** (ESI positive mode): 479.4  $[\text{M}+\text{Na}]^+$

**mp:** 153-154  $^\circ\text{C}$

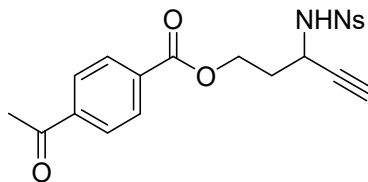

**4h:** Prepared according to standard amination conditions. Purified by silica gel chromatography (98:2 CH<sub>2</sub>Cl<sub>2</sub>/MeOH) to afford the product as a white solid (56 mg, 65%).

**<sup>1</sup>H NMR** (500 MHz, CDCl<sub>3</sub>) δ 8.31 (d, *J* = 9.0 Hz, 2H), 8.10 (d, *J* = 8.5 Hz, 2H), 8.07 (d, *J* = 8.5 Hz, 2H), 8.02 (d, *J* = 8.5 Hz, 2H), 5.25 (d, *J* = 9.0 Hz, 1H), 4.56 (dt, *J* = 11.5, 6.0 Hz, 1H), 4.49 (dt, *J* = 11.5, 6.0 Hz, 1H), 4.42 (m, 1H), 2.65 (s, 3H), 2.24 (q, *J* = 6.1 Hz, 2H), 2.11 (d, *J* = 2.5 Hz, 1H).

**<sup>13</sup>C NMR** (126 MHz, CDCl<sub>3</sub>) δ 197.63, 165.76, 150.36, 146.01, 140.69, 133.57, 130.03, 128.81, 128.48, 124.40, 80.33, 74.18, 61.15, 43.37, 35.62, 27.04.

**IR** (thin film) 3261, 1718, 1686, 1530, 1349, 1268, 1166, 1091, 1015, 912, 855, 737, 615 cm<sup>-1</sup>

**MS** (ESI positive mode): *m/z* 453.2 [M+Na]<sup>+</sup>

**mp:** 155-157 °C

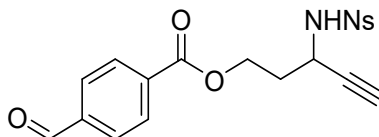

**4i:** Prepared according to standard amination conditions in DCM. Purified by alumina chromatography (80:20 DCM/Hexanes to 1:99 MeOH/DCM) to afford the product as a white solid (117 mg, 70%)

**<sup>1</sup>H NMR** (500 MHz, DMSO-*d*<sub>6</sub>) δ 10.12 (s, 1H), 8.76 (d, *J* = 9.0 Hz, 1H), 8.34 (d, *J* = 9.0 Hz, 2H), 8.12 (d, *J* = 8.0 Hz, 2H), 8.06-8.03 (m, 4H), 4.32 (t, *J* = 6.0 Hz, 2H), 4.32 (q, *J* = 8.0 Hz, 1H), 3.15 (d, *J* = 2.0 Hz, 1H), 2.10 – 2.04 (m, 2H).

**<sup>13</sup>C NMR** (126 MHz, DMSO-*d*<sub>6</sub>) δ 193.0, 164.8, 149.5, 146.4, 139.2, 134.1, 129.9, 129.6, 128.4, 124.3, 81.5, 75.5, 61.3, 42.0, 34.4.

**IR (Thin film)** 3431, 2917, 2850, 1702, 1635, 1529, 1456, 1348, 1165, 1091 cm<sup>-1</sup>

**MS** (ESI positive mode): *m/z* 439.6 [M+Na]<sup>+</sup>

**mp:** 147-148 °C

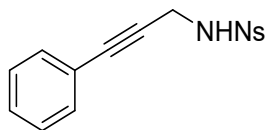

**4j:** Prepared according to amination conditions with 2.0 equiv. of benzoic acid, in toluene at 35 °C. Purified by silica gel chromatography (90:10 hexanes/ethyl acetate) to afford the product as a solid (84 mg, 79%).

**<sup>1</sup>H NMR** (500 MHz, CDCl<sub>3</sub>) δ 8.27 (d, *J* = 9 Hz, 2H), 8.12 (d, *J* = 9 Hz, 2H), 7.29 (t, *J* = 7 Hz, 1H), 7.22 (t, *J* = 7 Hz, 2H), 7.05 (d, *J* = 7 Hz, 2H), 4.97 (t, *J* = 6.5 Hz, 1H), 4.18 (d, *J* = 6.0 Hz, 2H).

**<sup>13</sup>C NMR** (126 MHz, CDCl<sub>3</sub>) δ 146.16, 131.46, 129.18, 128.93, 128.52, 124.58, 124.37, 121.52, 85.70, 82.64, 34.05.

**IR** (thin film): 3290, 3105, 1711, 1607, 1530, 1349, 1165, 1091, 855, 737, 684, 616 cm<sup>-1</sup>.

**MS** (ESI positive mode): *m/z* 317.1 [M+H]<sup>+</sup>

**mp:** 125-127 °C

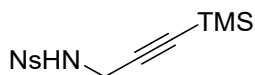

**4k:** Prepared according to standard amination conditions. Purified by silica gel chromatography (85:15 hexanes/ethyl acetate) to afford the product as a white solid (47.6 mg, 73%)

**<sup>1</sup>H NMR** (500 MHz, DMSO-*d*<sub>6</sub>) δ 8.56 (s, 1H), 8.45 (d, *J* = 8.3 Hz, 2H), 8.09 (d, *J* = 8.4 Hz, 2H), 3.89 (s, 2H), -0.07 (s, 9H).

**<sup>13</sup>C NMR** (126 MHz, DMSO-*d*<sub>6</sub>) δ 149.6, 146.6, 128.5, 124.4, 101.0, 88.3, 32.7, -0.6.

**IR** (thin film) 3450.0, 2957.5, 2905.7, 1636.5, 1531.3, 1345.8, 1306.1, 1249.1, 1162.1, 1077.8 cm<sup>-1</sup>

**MS** (ESI positive mode): 335.3 [M+Na]<sup>+</sup>

**mp:** 141-143 °C

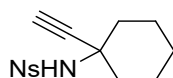

**4l:** Prepared according to standard amination conditions. Purified by silica gel chromatography (85:15 hexanes/ethyl acetate) to afford the product as a white solid (51.9 mg, 84%)

**<sup>1</sup>H NMR** (500 MHz, DMSO-*d*<sub>6</sub>) δ 8.38 (d, *J* = 9.0 Hz, 2H), 8.27 (s, 1H), 8.07 (d, *J* = 9.0 Hz, 2H), 2.97 (s, 1H), 1.76 (m, 2H), 1.64 – 1.54 (m, 4H), 1.45 – 1.36 (m, 3H), 1.23 – 1.17 (m, 1H).

**<sup>13</sup>C NMR** (126 MHz, DMSO-*d*<sub>6</sub>) δ 149.2, 148.2, 128.5, 124.0, 83.4, 76.5, 53.3, 38.0, 24.3, 21.7.

**IR** (thin film): 3256, 2944, 2857, 1531, 1421, 1351, 1335, 1306, 1167, 1094, 1002, 855, 740 cm<sup>-1</sup>

**MS** (ESI positive mode): *m/z* 331.5 [M+Na]<sup>+</sup>

**mp:** 155-156 °C

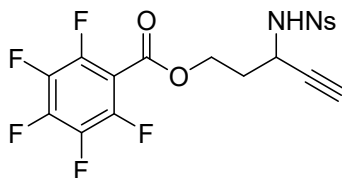

**4m:** Prepared according to standard amination conditions. Purified by silica gel chromatography (85:15 hexanes/ethyl acetate) to afford the product as a clear liquid (67 mg, 70%).

**<sup>1</sup>H NMR** (500 MHz, CDCl<sub>3</sub>) δ 8.37 (d, *J* = 8.5 Hz, 2H), 8.10 (d, *J* = 9.0 Hz, 2H), 5.24 (d, *J* = 9.5 Hz, 1H), 4.55 (m, 2H), 4.38 (m, 1H), 2.19 (m, 2H), 2.15 (d, *J* = 2.5 Hz, 1H)

**<sup>13</sup>C NMR** (126 MHz, CDCl<sub>3</sub>) δ 158.89, 150.42, 145.86, 128.86, 124.42, 79.76, 74.49, 62.54, 43.20, 35.21.

**IR** (thin film): 3291, 3106, 1750, 1530, 1350, 1194, 1165, 1093, 934, 854, 738 cm<sup>-1</sup>.

**MS** (ESI positive mode): *m/z* 501.1 [M+Na]<sup>+</sup>

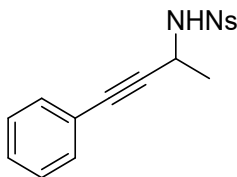

**4n:** Prepared according to standard amination conditions in toluene. Purified by silica gel chromatography (85:15 hexanes/ethyl acetate) to afford the product as a white solid (54.6 mg, 83%).

**<sup>1</sup>H NMR** (500 MHz, DMSO-*d*<sub>6</sub>) δ 8.66 (d, *J* = 9.0 Hz, 1H), 8.32 (d, *J* = 8.5 Hz, 2H), 8.10 (d, *J* = 8.5 Hz, 2H), 7.29 (t, *J* = 7.5 Hz, 1H), 7.22 (t, *J* = 7.5 Hz, 2H), 6.98 (d, *J* = 7 Hz, 2H), 4.39 (dq, *J* = 4.0, 7.0 Hz, 1H), 1.41 (d, *J* = 7.5 Hz, 3H).

**<sup>13</sup>C NMR** (126 MHz, DMSO-*d*<sub>6</sub>) δ 149.3, 146.7, 130.9, 128.6, 128.5, 128.3, 124.3, 121.3, 88.8, 83.0, 41.1, 22.4.

**IR** (thin film): 3270, 2991, 2939, 2865, 1605, 1529, 1490, 1424, 1348, 1311, 1167, 1123, 1090, 974, 853 cm<sup>-1</sup>

**MS** (ESI positive mode): *m/z* 353.5 [M+Na]<sup>+</sup>

**mp:** 132-133 °C

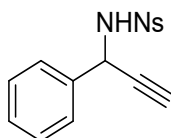

**4o:** Prepared according to standard amination conditions in toluene at 35°C with the addition of CaO (0.4 mmol). Purified by silica gel chromatography (85:15 hexanes/ethyl acetate) to afford the product as a pale yellow solid (46.8 mg, 74%)

**<sup>1</sup>H NMR** (300 MHz, DMSO-*d*<sub>6</sub>) δ 9.11 (d, *J* = 9.2 Hz, 1H), 8.36 (d, *J* = 8.8 Hz, 2H), 8.03 (d, *J* = 8.8 Hz, 2H), 7.31 (m, 5H), 5.32 (dd, *J* = 9.1, 2.2 Hz, 1H), 3.34 (d, *J* = 2.4 Hz, 1H).

**<sup>13</sup>C NMR** (126 MHz, DMSO-*d*<sub>6</sub>) δ 149.4, 146.6, 137.6, 128.4, 128.3, 128.0, 127.0, 124.1, 80.7, 77.0, 48.2.

**IR** (Thin film) 3273 2916, 2849, 1524, 1427, 1338, 1311, 1089, 1048, 964, 858 cm<sup>-1</sup>

**MS** (ESI positive mode): *m/z* 339.2 [M+Na]<sup>+</sup>

**mp:** 172-173 °C

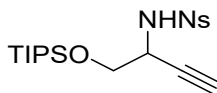

**4p:** Prepared according to standard amination conditions at 35°C. Purified by silica gel chromatography (85:15 hexanes/ethyl acetate) to afford the product as a pale yellow solid (54.8 mg, 64%)

**<sup>1</sup>H NMR** (300 MHz, DMSO-*d*<sub>6</sub>) δ 8.64 (d, *J* = 8.9 Hz, 1H), 8.40 (d, *J* = 8.8 Hz, 2H), 8.07 (d, *J* = 8.9 Hz, 2H), 4.04 (qd, *J* = 6.3, 2.1 Hz, 1H), 3.65 (d, *J* = 6.4 Hz, 2H), 3.08 (d, *J* = 2.2 Hz, 1H), 1.08–0.90 (m, 21H).

**<sup>13</sup>C NMR** (126 MHz, DMSO-*d*<sub>6</sub>) δ 149.5, 146.8, 128.3, 124.2, 80.0, 75.6, 65.5, 47.3, 17.6, 11.3.

**IR** (Thin film) 3426, 2946, 2849, 1643, 1530, 1344, 1165, 1053 cm<sup>-1</sup>

**MS** (ESI positive mode): [M+Na]<sup>+</sup> 449.3

**mp:** 67-68 °C

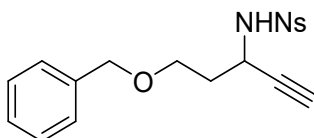

**4q:** Prepared according to standard amination conditions with the addition of 4-nitrobenzoic acid (0.4 mmol). Purified by silica gel chromatography (85:15 hexanes/ethyl acetate) to afford the product as a pale yellow solid (43.9 mg, 59%)

**<sup>1</sup>H NMR** (500 MHz, DMSO-*d*<sub>6</sub>) δ 8.65 (d, *J* = 8.9 Hz, 1H), 8.42 (d, *J* = 9.0 Hz, 2H), 8.08 (d, *J* = 9.0 Hz, 2H), 7.38 – 7.27 (m, 5H), 4.42 (s, 2H), 4.18 (qd, *J* = 7.5, 2.1 Hz, 1H), 3.49 (t, *J* = 6.0 Hz, 2H), 3.06 (d, *J* = 2.3 Hz, 1H), 1.94 – 1.78 (m, 2H).

**<sup>13</sup>C NMR** (126 MHz, DMSO-*d*<sub>6</sub>) δ 150.2, 147.4, 139.0, 129.1, 128.9, 128.0, 125.0, 82.2, 76.0, 72.7, 66.1, 42.8, 36.5.

**IR** (thin film) 3439, 2954, 2916, 2857, 1644, 1529, 1348, 1311, 1164, 1090, 852 cm<sup>-1</sup>

**MS** (ESI positive mode): 397.4 [M+Na]<sup>+</sup>

**mp:** 99-101 °C

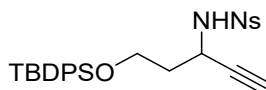

**4r:** Prepared according to standard amination conditions. Purified by silica gel chromatography (85:15 hexanes/ethyl acetate) to afford the product as a white solid (90.1 mg, 86%)

**<sup>1</sup>H NMR** (500 MHz, DMSO-*d*<sub>6</sub>) δ 8.66 (d, *J* = 8.8 Hz, 1H), 8.42 (d, *J* = 8.9 Hz, 2H), 8.08 (d, *J* = 8.9 Hz, 2H), 7.63 – 7.55 (m, 4H), 7.51 – 7.40 (m, 6H), 4.33 (td, *J* = 9.2, 2.0 Hz, 1H), 3.76 – 3.65 (m, 2H), 3.08 (d, *J* = 2.2 Hz, 1H), 1.91 – 1.77 (m, 2H), 0.97 (s, 9H).

**<sup>13</sup>C NMR** (126 MHz, DMSO-*d*<sub>6</sub>) δ 149.5, 146.7, 134.9, 132.8, 129.8, 129.0, 128.4, 127.8, 124.3, 81.5, 75.3, 59.3, 41.7, 38.3, 26.5, 18.7.

**IR** (thin film) 3280, 2929, 2855, 1530, 1427, 1348, 1311, 1167, 1110, 1090, 999 cm<sup>-1</sup>

**MS** (ESI positive mode): 545.3 [M+Na]<sup>+</sup>

**mp:** 107-108 °C

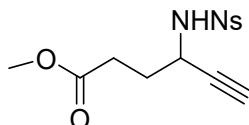

**4s:** Prepared according to standard amination conditions with the addition of 4-nitrobenzoic acid (0.4 mmol). For purification and analysis, the free carboxylic acid was methylated using the following procedure: methylnitronitrosoguanidine (2.0 mmol) was added to a mixture of aqueous KOH (1 M, 8 mL) and 8 mL of diethyl ether at 0 °C. After stirring for 10 minutes, the ether layer was slowly added to the crude amination reaction mixture and stirred for 30 minutes at 0 °C. Excess glacial acetic acid was added dropwise until gas evolution ceased. Purified by silica gel chromatography (85:15 hexanes/ethyl acetate) to afford the product as a white solid (45.1 mg, 70%)

**<sup>1</sup>H NMR** (500 MHz, DMSO-*d*<sub>6</sub>) δ 8.62 (d, *J* = 9.0 Hz, 1H), 8.42 (d, *J* = 8.5 Hz, 2H), 8.05 (d, *J* = 9.0 Hz, 2H), 4.11 (qd, *J* = 7.5, 2.0 Hz, 1H), 3.57 (s, 3H), 3.08 (d, *J* = 2.5 Hz, 1H), 2.42 (td, *J* = 7.2, 1.6 Hz, 2H), 1.84 (q, *J* = 7.3 Hz, 2H).

**<sup>13</sup>C NMR** (126 MHz, DMSO-*d*<sub>6</sub>) δ 172.9, 150.1, 147.0, 128.9, 124.8, 81.7, 76.1, 51.9, 44.5, 31.2, 29.8.

**IR** (thin film) 3265, 2922, 2851, 1712, 1528, 1461, 1347, 1162, 1075, 853, 731 cm<sup>-1</sup>

**MS** (ESI positive mode): m/z 349.0 [M+Na]<sup>+</sup>

**mp:** 112-114 °C

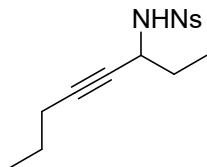

**4t:** Prepared according to standard amination conditions. Purified by silica gel chromatography (85:15, hexanes/ethyl acetate) to afford the product as a white solid (33 mg, 54%).

**<sup>1</sup>H NMR** (500 MHz, CDCl<sub>3</sub>) δ 8.33 (d, *J* = 9.0 Hz, 2H), 8.08 (d, *J* = 9.0 Hz, 2H), 4.90 (d, *J* = 9.5 Hz, 1H), 4.05 (m, 1H), 1.83 (dt, *J* = 2.0, 7.0 Hz, 2H), 1.69 (m, 2H), 1.23 (sextet, *J* = 7.0 Hz, 2H), 0.98 (t, *J* = 7.5 Hz, 3H), 0.77 (t, *J* = 7.5 Hz, 3H).

**<sup>13</sup>C NMR** (126 MHz, CDCl<sub>3</sub>) δ 150.18, 146.61, 128.85, 124.16, 85.87, 77.64, 47.86, 30.46, 21.87, 20.40, 13.39, 9.98.

**IR** (thin film) 3280, 3106, 2967, 2936, 2875, 1607, 1531, 1428, 1350, 1311, 1168, 1091, 996, 854, 738, 685, 619, 560 cm<sup>-1</sup>

**MS** (ESI positive mode): *m/z* 333.1 [M+Na]<sup>+</sup>

**mp:** 101-104 °C

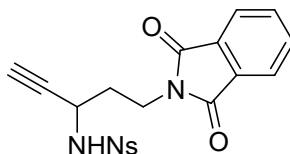

**4u:** Prepared according to standard amination conditions. Purified by silica gel chromatography (85:15 hexanes/ethyl acetate) to afford the product as a white solid (71.8 mg, 87%)

**<sup>1</sup>H NMR** (500 MHz, DMSO) δ 8.75 (s, 1H), 8.41 (d, *J* = 8.9 Hz, 3H), 8.07 (d, *J* = 8.9 Hz, 2H), 7.89 – 7.83 (m, 5H), 4.15 (t, *J* = 6.6 Hz, 1H), 3.69 (t, *J* = 7.5 Hz, 2H), 3.08 (d, *J* = 2.3 Hz, 1H), 2.00 – 1.89 (m, 2H).

**<sup>13</sup>C NMR** (126 MHz, DMSO) δ 167.8, 134.3, 131.7, 128.5, 124.3, 123.0, 81.0, 75.7, 63.6, 43.0, 34.2.

**IR** (thin film): 3433, 1707, 1635, 1530, 1402, 1349, 1167, 1093 cm<sup>-1</sup>

**MS** (ESI positive mode): *m/z* 436.4 [M+Na]<sup>+</sup>

**mp:** 199-201 °C

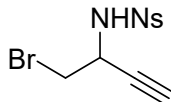

**4v:** Prepared according to standard amination conditions in CH<sub>2</sub>Cl<sub>2</sub>. Purified by silica gel chromatography (85:15 hexanes/ethyl acetate) to afford the product as a white solid (49.1 mg, 74%)

**<sup>1</sup>H NMR** (500 MHz, DMSO-*d*<sub>6</sub>) δ 8.93 (d, *J* = 9.0 Hz, 1H), 8.42 (d, *J* = 8.5 Hz, 2H), 8.01 (d, *J* = 9.0 Hz, 2H), 4.38 (m, 1H), 3.57 (dd, *J* = 10.5, 6.0 Hz, 1H), 3.52 (dd, *J* = 10.0, 6.5 Hz, 1H), 3.26 (d, *J* = 2.5 Hz, 1H).

**<sup>13</sup>C NMR** (126 MHz, DMSO-*d*<sub>6</sub>) δ 149.6, 146.3, 128.4, 124.3, 79.3, 76.7, 46.1, 35.3.

**IR** (thin film) 3442, 924, 2857, 1644, 1529, 1420, 1349, 1313, 1164, 1091 cm<sup>-1</sup>

**MS** (ESI positive mode): *m/z* 354.4 [M+Na]<sup>+</sup>

mp: 147-148 °C

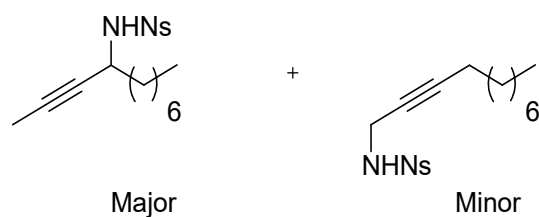

**6a/7a:** Prepared according to standard amination conditions. Purified by silica gel chromatography (80:20, hexanes/ethyl acetate) to afford a 4:1 mixture of regioisomeric products as a liquid (50mg, 71%).

**<sup>1</sup>H NMR** (500 MHz, CDCl<sub>3</sub>) δ 8.34 (d, *J* = 9 Hz, 2H) (major + minor), 8.10 (d, *J* = 9 Hz, 2H) (major + minor), 5.20 (t, *J* = 6 Hz, 1H) (minor), 5.13 (d, *J* = 9.5 Hz, 1H) (major), 4.05 (qt, *J* = 7, 2.5 Hz, 1H) (major), 3.89 (td, *J* = 4.5, 2.5 Hz, 2H) (minor), 1.9-1.8 (m, 2H) (minor), 1.7-1.5 (m, 2H) (major), 1.45 (d, *J* = 2 Hz, 3H) (major), 1.4-1.3 (m, 2H) (major), 1.3-1.1 (m, 10H) (major + minor), 1.0-0.8 (m, 3H) (major + minor).

**<sup>13</sup>C NMR** (126 MHz, CDCl<sub>3</sub>) δ 150.18, 150.06, 146.53, 146.16, 129.14, 128.89, 124.19, 124.00, 86.28, 81.27, 77.41, 73.61, 46.41, 36.80, 33.54, 31.84, 31.75, 29.17, 29.13, 29.03, 28.92, 28.85, 28.37, 25.44, 22.67, 22.64, 18.45, 14.13, 14.10, 3.19.

**IR** (thin film): 3280, 3106, 2927, 2857, 1607, 1531, 1428, 1349, 1311, 1166, 1092, 1054, 855, 738, 685, 619 cm<sup>-1</sup>.

**MS** (ESI positive mode): *m/z* 375.1 [M+Na]<sup>+</sup>

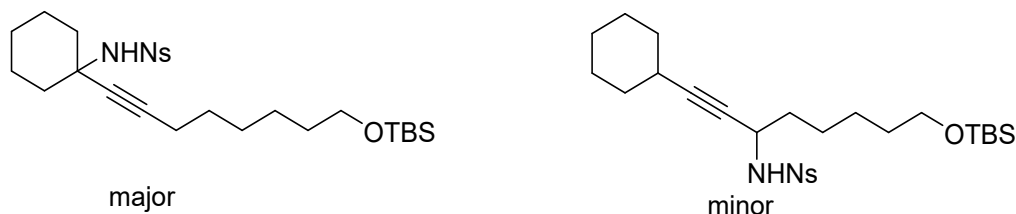

**6b/7b:** Prepared according to standard amination conditions. Purified by silica gel chromatography (90:10, hexanes/ethyl acetate) to afford the major product **7b** as a liquid (62 mg, 58%) and the minor product **6b** as a liquid (29.8 mg, 29%).

**6b (major):** **<sup>1</sup>H NMR** (500 MHz, CDCl<sub>3</sub>) δ 8.34 (d, *J* = 9 Hz, 2H), 8.11 (d, *J* = 9 Hz, 2H), 4.85 (s, 1H), 3.60 (t, *J* = 6.5 Hz, 2H), 2.04 – 1.97 (m, 2H), 1.84 – 1.79 (m, 2H), 1.69 – 1.44 (m, 10H), 1.30 – 1.21 (m, 10H), 0.91 (s, 9H), 0.06 (s, 6H).

**<sup>13</sup>C NMR** (126 MHz, CDCl<sub>3</sub>) δ 149.8, 148.1, 128.9, 123.7, 87.4, 78.4, 63.1, 55.3, 39.6, 32.7, 28.6, 28.4, 26.0, 25.3, 24.9, 22.5, 18.5, 18.4, -5.3.

**7b (minor):** **<sup>1</sup>H NMR** (500 MHz, CDCl<sub>3</sub>) δ 8.36 (d, *J* = 8 Hz, 2H), 8.11 (d, *J* = 8 Hz, 2H), 4.77 (d, *J* = 9 Hz, 1H), 4.14 (s, 1H), 3.61 (t, *J* = 6 Hz, 2H), 2.05 (s, 1H), 1.74–1.00 (m, 25H), 0.91 (s, 9H), 0.06 (s, 6H).

**<sup>13</sup>C NMR** (126 MHz, CDCl<sub>3</sub>) δ 170.2, 150.1, 146.5, 128.7, 124.1, 89.8, 77.5, 63.0, 46.4, 37.2, 32.6, 32.3, 28.6, 26.0, 25.6, 25.3, 25.2, 24.6, 18.4, -5.3.

**IR** (thin film): 3276, 2931, 2857, 1606, 1532, 1348, 1160, 1095 cm<sup>-1</sup>

**MS** (ESI positive mode): *m/z* 545.8 [M+Na]<sup>+</sup>

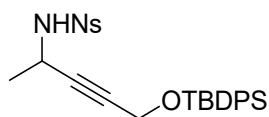

**6c:** Prepared according to standard amination conditions. Purified by silica gel chromatography (85:15 hexanes/ethyl acetate) to afford a single isomer of the product as a clear liquid (83 mg, 80%).

**<sup>1</sup>H NMR** (500 MHz, CDCl<sub>3</sub>) δ 8.24 (d, *J* = 9 Hz, 2H), 7.98 (d, *J* = 9 Hz, 2H), 7.63 (m, 4H), 7.46 (m, 2H), 7.40 (m, 4H), 4.59 (d, *J* = 8.5 Hz, 1H), 4.17 (m, 1H), 4.08 (dd, *J* = 16, 1.5 Hz 1H), 4.02 (dd, *J* = 16, 1.5 Hz 1H), 1.32 (d, *J* = 7.0 Hz, 3H), 1.00 (s, 9H).

**<sup>13</sup>C NMR** (126 MHz, CDCl<sub>3</sub>) δ 150.23, 146.38, 135.86, 135.81, 133.24, 133.22, 130.25, 130.21, 128.81, 127.99, 127.97, 124.27, 83.61, 83.05, 52.41, 41.98, 26.83, 23.50, 19.29.

**IR** (thin film): 3280, 3104, 3071, 2931, 2859, 2255, 1961, 1892, 1826, 1710, 1606, 1530, 1471, 1427, 1348, 1311, 1158, 1109, 1071, 1011, 955, 909, 853, 823, 736, 703, 618, 571 cm<sup>-1</sup>.

**MS** (ESI positive mode): *m/z* 545.0 [M+Na]<sup>+</sup>

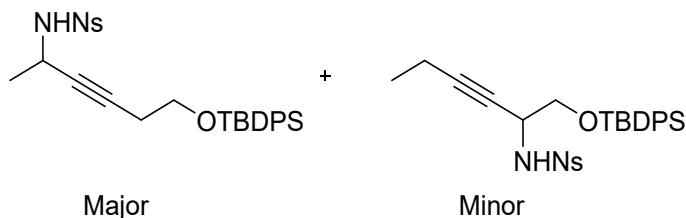

**6d/7d:** Prepared according to standard amination conditions. Purified by silica gel chromatography (85:15, hexanes/ethyl acetate) to afford a 12:1 mixture of products as a liquid (84 mg, 79%).

**<sup>1</sup>H NMR** (500 MHz, CDCl<sub>3</sub>) δ 8.31 (d, *J* = 9 Hz, 2H) (minor), 8.26 (d, *J* = 9 Hz, 2H) (major), 8.09 (d, *J* = 9 Hz, 2H) (minor), 8.02 (d, *J* = 9 Hz, 2H) (major), 7.63 (d, *J* = 8 Hz, 4H) (major + minor), 7.45 (t, *J* = 7.5 Hz, 2H) (major + minor), 7.40 (t, *J* = 8 Hz, 4H) (major + minor), 5.18 (d, *J* = 8.5 Hz, 1H) (minor), 4.82 (d, *J* = 8.5 Hz, 1H) (major), 4.25-4.20 (m, 1H) (major + minor), 4.16 (dd, *J* = 11, 4.5 Hz, 2H) (minor), 3.87 (m, 2H) (major+minor), 2.20 (tt, *J* = 7, 2 Hz, 2H) (major), 2.06 (s, 3H) (minor), 2.02 (s, 3H) (major), 1.91 (qd, *J* = 7.5, 2 Hz, 2H) (minor), 1.42 (d, *J* = 8 Hz, 3H) (major), 0.87 (t, *J* = 7.5 Hz, 3H) (minor)

**<sup>13</sup>C NMR** (126 MHz, CDCl<sub>3</sub>) δ 170.83, 150.25, 146.50, 128.81, 124.21, 80.61, 80.38, 65.72, 61.81, 45.71, 41.96, 23.69, 20.88, 18.99, 13.37, 12.12

**IR** (thin film): 3279, 3070, 2931, 2857, 2247, 1606, 1530, 1471, 1427, 1348, 1311, 1160, 1111, 1012, 965, 911, 853, 823 737, 703, 614 cm<sup>-1</sup>.

**MS** (ESI positive mode): [M+H]<sup>+</sup> 537.4

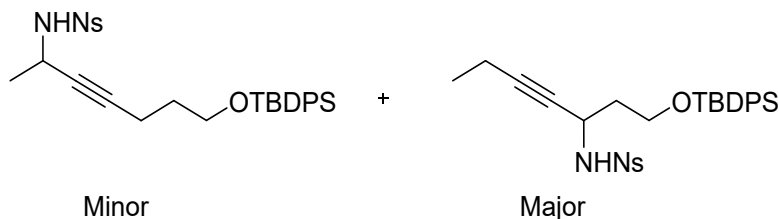

**6e/7e:** Prepared according to standard amination conditions. Purified by silica gel chromatography (85:15 hexanes/ethyl acetate) to afford a 1.2:1 mixture of regioisomeric products as a liquid (92 mg, 82%).



**<sup>1</sup>H NMR** (500 MHz, CDCl<sub>3</sub>) δ 8.31 (d, *J* = 9.0 Hz, 2H, major), 8.26 (d, *J* = 9.0 Hz, 2H, minor) 8.01 (m, 4H, major + minor), 7.64 (m, 8H, major + minor), 7.41 (m, 12H, major + minor), 6.14 (d, *J* = 8.5 Hz, 1H, major), 4.74 (d, *J* = 8.5 Hz, 1H, minor), 4.55 (m, 1H, major), 4.20 (m, 1H, minor), 4.02 (dt, *J* = 9.0, 2.5 Hz, 2H, major), 3.76 (dt, *J* = 9.0, 2.5 Hz, 2H, major), 3.54 (m, 2H, minor), 2.03 (m, 3H, major + minor), 1.83 (m, 3H, major + minor), 1.50 (sextet, *J* = 6.0 Hz, 2H, minor), 1.38 (d, *J* = 7.0 Hz, 3H, minor), 1.09 (s, 9H, major), 1.03 (s, 9H, minor), 1.09 (t, *J* = 7.5 Hz, 3H, major)

**<sup>13</sup>C NMR** (126 MHz, CDCl<sub>3</sub>) δ 150.12, 150.00, 147.11, 146.47, 135.69, 135.66, 135.58, 133.82, 133.78, 133.00, 132.63, 130.14, 130.09, 129.84, 128.90, 128.77, 127.99, 127.98, 127.82, 124.10, 123.94, 87.91, 84.65, 78.82, 76.16, 62.18, 61.31, 45.18, 42.09, 37.38, 31.20, 26.96, 26.92, 24.02, 19.31, 19.23, 14.92, 13.58, 12.16.

**IR** (thin film): 3284, 3071, 2932, 2858, 1607, 1531, 1472, 1428, 1349, 1312, 1166, 1110, 1010, 966, 910, 854, 823, 737, 704, 616 cm<sup>-1</sup>.

**MS** (ESI positive mode): *m/z* 573.3 [M+Na]<sup>+</sup>

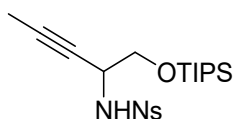

**6f/7f**: Prepared according to standard amination conditions. Purification by silica gel chromatography (85:15 hexanes/ethyl acetate) allowed separation of the 2:1 mixture of regioisomers to afford product **7f** as a white solid (25 mg, 28%) and **6f** as a white solid (37 mg, 41%).

**6f**: **<sup>1</sup>H NMR** (500 MHz, CDCl<sub>3</sub>) δ 8.33 (d, *J* = 9.0 Hz, 2H), 8.10 (d, *J* = 9.0 Hz, 2H), 5.13 (d, *J* = 7.5 Hz, 1H), 4.17 (m, 1H), 3.84 (dd, *J* = 9.5, 4.0 Hz, 1H), 3.75 (d, *J* = 9.5, 4.0 Hz, 1H), 1.50 (d, *J* = 2.0 Hz, 3H), 1.06 (m, 21H).

**<sup>13</sup>C NMR** (126 MHz, CDCl<sub>3</sub>) δ 150.15, 146.69, 128.96, 124.02, 82.00, 74.97, 66.2148.07, 18.08, 17.96, 12.00, 3.32.

**IR** (thin film): 3280, 3104, 3071, 2931, 2859, 2255, 1961, 1892, 1826, 1710, 1606, 1530, 1471, 1427, 1348, 1311, 1158, 1109, 1071, 1011, 955, 909, 853, 823, 736, 703, 618, 571 cm<sup>-1</sup>.

**MS** (ESI positive mode): *m/z* 463.1 [M+Na]<sup>+</sup>

**mp**: 70-72 °C

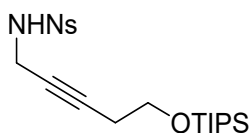

**7f**: **<sup>1</sup>H NMR** (500 MHz, CDCl<sub>3</sub>) δ 8.34 (d, *J* = 9.0 Hz, 2H), 8.08 (d, *J* = 9.0 Hz, 2H), 4.92 (t, *J* = 6.0 Hz, 1H), 3.90 (dt, *J* = 5.5, 2.5 Hz, 1H), 3.58 (t, *J* = 7.0 Hz, 2H), 2.17 (tt, *J* = 7.0, 2.5 Hz, 2H), 1.03 (m, 21H).

**<sup>13</sup>C NMR** (126 MHz, CDCl<sub>3</sub>) δ 150.28, 146.10, 128.83, 124.28, 83.51, 74.76, 61.74, 33.61, 23.05, 18.01, 12.04.

**IR** (thin film): 3280, 3104, 3071, 2931, 2859, 2255, 1961, 1892, 1826, 1710, 1606, 1530, 1471, 1427, 1348, 1311, 1158, 1109, 1071, 1011, 955, 909, 853, 823, 736, 703, 618, 571 cm<sup>-1</sup>.

**MS** (ESI positive mode): *m/z* 463.1 [M+Na]<sup>+</sup>

**mp**: 62-63 °C

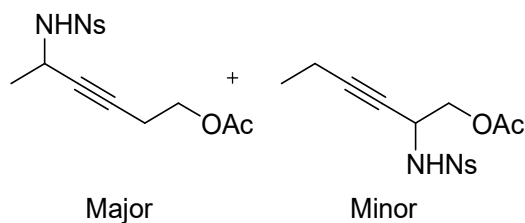

**6g/7g:** Prepared according to standard amination conditions with  $\text{CH}_2\text{Cl}_2$  as solvent. Purified by silica gel chromatography (85:15 hexanes/ethyl acetate) to afford a 9:1 mixture of regiosomeric products as a clear liquid (46 mg, 68%).

**$^1\text{H}$  NMR** (500 MHz,  $\text{CDCl}_3$ )  $\delta$  8.36 (d,  $J = 9.0$  Hz, 2H, major + minor), 8.10 (d,  $J = 9.0$  Hz, 2H, major + minor), 5.31 (d,  $J = 9.0$  Hz, 1H, minor), 5.11 (d,  $J = 9.0$  Hz, 1H, major), 4.5-4.4 (m, 1H, minor), 4.3-4.2 (m, 1H, major + minor), 4.16 (dd,  $J = 11.0, 4.5$  Hz, 2H, minor), 3.9-3.8 (m, 2H, major), 2.20 (tt,  $J = 7.0, 2.0$  Hz, 2H, major), 2.06 (s, 3H, minor), 2.02 (s, 3H, major), 1.91 (qd,  $J = 7.5, 2.0$  Hz, 2H, minor), 1.42 (d,  $J = 8.0$  Hz, 3H, major), 0.87 (t,  $J = 7.5$  Hz, 3H, minor)

**$^{13}\text{C}$  NMR** (126 MHz,  $\text{CDCl}_3$ )  $\delta$  170.83, 150.25, 146.50, 128.81, 124.21, 80.61, 80.38, 65.72, 61.81, 45.71, 41.96, 23.69, 20.88, 18.99, 13.37, 12.12

IR (thin film): 3270, 2984, 1739, 1531, 1350, 1241, 1160, 1089, 1043, 854, 738, 685, 618  $\text{cm}^{-1}$ .

**MS** (ESI positive mode):  $m/z$  573.3  $[\text{M}+\text{Na}]^+$

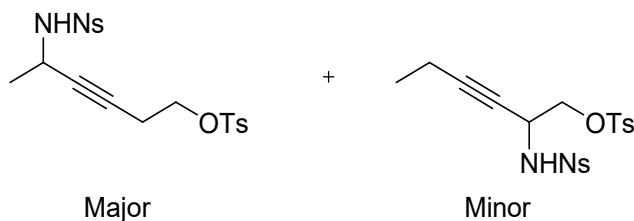

**6h:** Prepared according to standard amination conditions. Purified by silica gel chromatography (80:20 hexanes/ethyl acetate) to afford a 19:1 mixture of regiosomeric products as a solid (49 mg, 62%).

**$^1\text{H}$  NMR** (500 MHz,  $\text{CDCl}_3$ )  $\delta$  8.33 (d,  $J = 9$  Hz, 2H, major + minor), 8.07 (d,  $J = 9$  Hz, 2H, major + minor), 7.76 (d,  $J = 8$  Hz, 2H, major + minor), 7.36 (d,  $J = 8$  Hz, 2H, major + minor), 5.03 (d,  $J = 8.5$  Hz, 1H, major), 4.4-4.3 (m, 1H, minor), 4.2-4.1 (m, 1H, major), 4.1-4.0 (m, 2H, minor), 3.9-3.8 (m, 2H, major), 2.46 (s, 3H, major + minor), 2.3-2.2 (m, 2H, major), 1.90 (qd,  $J = 7.5, 2.0$  Hz, 2H, minor), 1.41 (d,  $J = 7$  Hz, 3H, major), 0.88 (t,  $J = 7.5$  Hz, 3H, minor)

**$^{13}\text{C}$  NMR** (126 MHz,  $\text{CDCl}_3$ )  $\delta$  150.35, 146.49, 145.46, 133.08, 130.23, 128.93, 128.06, 124.39, 81.36, 79.60, 67.53, 42.05, 23.85, 21.90, 19.81, 0.23.

IR (thin film): 3279, 3070, 2931, 2857, 2247, 1606, 1530, 1471, 1427, 1348, 1311, 1160, 1111, 1012, 965, 911, 853, 823, 737, 703, 614  $\text{cm}^{-1}$ .

**MS** (ESI positive mode):  $m/z$  475.0  $[\text{M}+\text{Na}]^+$

**mp:** 154-157  $^\circ\text{C}$

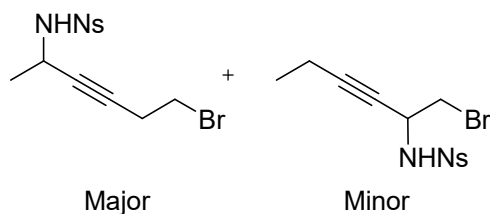

**6i/7i:** Prepared according to standard amination conditions with  $\text{CH}_2\text{Cl}_2$  as solvent. Purified by silica gel chromatography (85:15 hexanes/ethyl acetate) to afford a 5:1 mixture of regioisomeric products as a clear liquid (44 mg, 61%).

**$^1\text{H}$  NMR** (500 MHz,  $\text{CDCl}_3$ )  $\delta$  8.36 (d,  $J = 9.0$  Hz, 2H, major + minor), 8.11 (d,  $J = 9.0$  Hz, 2H, major + minor), 5.38 (d,  $J = 9.0$  Hz, 1H, minor), 5.14 (d,  $J = 9.0$  Hz, 1H, major), 4.5-4.4 (m, 1H, minor), 4.3-4.2 (m, 1H, major), 3.54 (dd,  $J = 10.5, 5.0$  Hz, 1H, minor), 3.50 (dd,  $J = 10.5, 5.0$  Hz, 1H, minor), 3.17 (t,  $J = 7.0$  Hz, 2H, major), 2.64 (m, 2H, major), 1.92 (qd,  $J = 7.5, 2.0$  Hz, 2H, minor), 1.44 (d,  $J = 7$  Hz, 3H, major), 0.89 (t,  $J = 7.5$  Hz, 3H, minor)

**$^{13}\text{C}$  NMR** (126 MHz,  $\text{CDCl}_3$ )  $\delta$  150.21, 146.36, 146.06, 128.82, 124.28, 88.94, 81.74, 80.80, 74.35, 46.89, 41.95, 36.61, 29.38, 23.73, 22.85, 13.31, 12.14.

**IR** (thin film): 3282, 3106, 2983, 2935, 2872, 1607, 1530, 1421, 1350, 1312, 1161, 1089, 958, 911, 854, 738, 685, 617, 551  $\text{cm}^{-1}$ .

**MS** (ESI positive mode):  $m/z$  383.0  $[\text{M}+\text{Na}]^+$

**mp:** 107-109  $^\circ\text{C}$

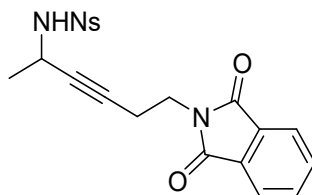

**6j/7j:** Prepared according to standard amination conditions. Crude mixture was obtained in a 6:1 ratio of isomers in 62% yield. Purified by silica gel chromatography (40:40:20 hexanes/toluene/ethyl acetate) to afford pure isomer **7j** as a white solid (45 mg, 53%).

**$^1\text{H}$  NMR** (500 MHz,  $\text{CDCl}_3$ )  $\delta$  8.32 (d,  $J = 9.0$  Hz, 2H), 8.06 (d,  $J = 9.0$  Hz, 2H), 7.9-7.8 (m, 2H), 7.8-7.7 (m, 2H), 5.00 (d,  $J = 7.5$  Hz, 1H), 4.2-4.1 (m, 1H), 3.7-3.6 (m, 2H), 2.4-2.3 (m, 1H), 2.2-2.1 (m, 1H), 1.34 (d,  $J = 7.0$  Hz, 3H).

**$^{13}\text{C}$  NMR** (126 MHz,  $\text{CDCl}_3$ )  $\delta$  168.26, 150.23, 146.45, 134.44, 131.93, 128.81, 124.19, 123.58, 81.52, 80.77, 42.06, 36.64, 23.83, 18.74.

**IR** (thin film): 3266, 2935, 1772.1, 1710, 1608, 1530, 1432, 1397, 1349, 1160, 1114, 1087, 1001, 913, 854, 738, 720  $\text{cm}^{-1}$ .

**MS** (ESI positive mode):  $m/z$  450.1  $[\text{M}+\text{Na}]^+$

**mp:** 184-187  $^\circ\text{C}$

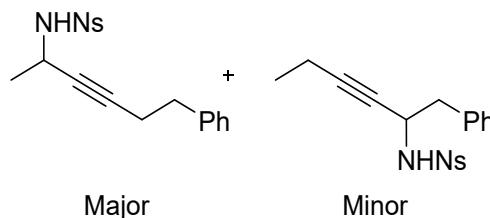

**6k/7k:** Prepared according to amination conditions with toluene as the solvent. Purified by silica gel chromatography (85:15 hexanes/ethyl acetate) to afford a 2.5:1 mixture of regioisomeric products as a liquid (48 mg, 64%).

**<sup>1</sup>H NMR** (500 MHz, CDCl<sub>3</sub>) δ 8.28 (d, *J* = 9.0 Hz, 2H, minor), 8.25 (d, *J* = 9.0 Hz, 2H, major), 7.98 (d, *J* = 9.0 Hz, 2H, major + minor), 7.3-7.2 (m, 3H, major + minor), 7.1-7.0 (m, 2H, major) 4.7-4.6 (m, 1H, major + minor), 4.4-4.3 (m, 1H, minor), 4.3-4.2 (m, 1H, major), 2.98 (dd, *J* = 6.5, 2.0 Hz, 2H, minor), 2.57 (t, *J* = 7.0 Hz, 2H, major), 2.20 (tt, *J* = 7.0, 2.0 Hz, 2H, major), 1.91 (qd, *J* = 7.5, 2.0 Hz, 2H, minor), 1.42 (d, *J* = 7.0 Hz, 3H, major), 0.87 (t, *J* = 7.5 Hz, 3H, minor)

**<sup>13</sup>C NMR** (126 MHz, CDCl<sub>3</sub>) δ 150.13, 146.36, 140.22, 135.47, 130.03, 128.80, 128.62, 128.56, 128.53, 127.44, 126.67, 124.14, 124.11, 84.46, 79.67, 47.22, 42.96, 42.14, 34.65, 23.98, 20.66, 13.50, 12.16.

**IR** (thin film): 3282, 2935, 1606, 1530, 1427, 1349, 1312, 1162, 1089, 1014, 960, 854, 738, 700, 618 cm<sup>-1</sup>

**MS** (ESI positive mode): *m/z* 359.2 [M+H]<sup>+</sup>

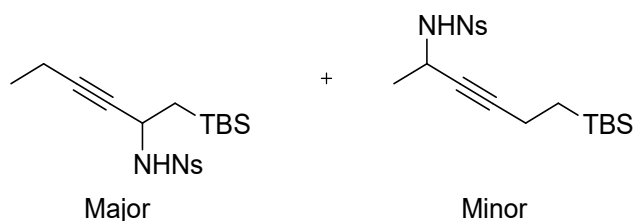

**6l/7l:** Prepared according to standard amination conditions. Purified by silica gel chromatography (90:10 hexanes/ethyl acetate) to afford a 9:1 mixture of regioisomeric products as a liquid (49 mg, 62%).

**<sup>1</sup>H NMR** (500 MHz, CDCl<sub>3</sub>) δ 8.35 (d, *J* = 9 Hz, 2H, major + minor), 8.10 (d, *J* = 9 Hz, 2H, major + minor), 4.79 (m, 1H, major + minor), 4.21 (m, 1H, major + minor), 1.9-1.8 (m, 2H, minor), 1.80 (dq, *J* = 7.5, 2Hz, 2H, major), 1.43 (d, 3H, minor), 1.2-1.0 (m, 2H, major), 0.83 (m, 9H, major + minor), 0.6-0.5 (m, 2H, minor), 0.04 (m, 6H, major), -0.13 (s, 6H, minor)

**<sup>13</sup>C NMR** (126 MHz, CDCl<sub>3</sub>) δ 150.24, 146.90, 129.07, 129.01, 87.08, 78.87, 44.41, 42.32, 26.59, 26.49, 24.06, 22.81, 16.64, 13.46, 12.20, 12.07, -5.27, -5.78, -6.24

**IR** (thin film): 2988, 2361, 2341, 1756, 1725, 1600, 1463, 1348, 1174, 749, 668 cm<sup>-1</sup>.

**MS** (ESI positive mode): *m/z* 419.1 [M+Na]<sup>+</sup>

**Intermolecular competition experiments:** A 1:1 mixture of starting alkynes was subjected to the standard propargyl amination conditions. After 10 hours, the reaction mixture was diluted with DCM and pushed through a silica plug. The aminated product ratio was determined by <sup>1</sup>H NMR spectroscopy.

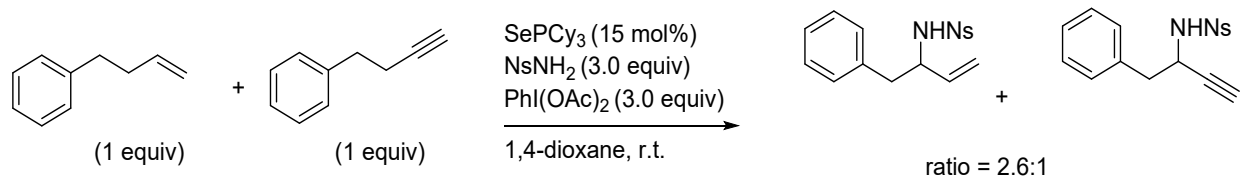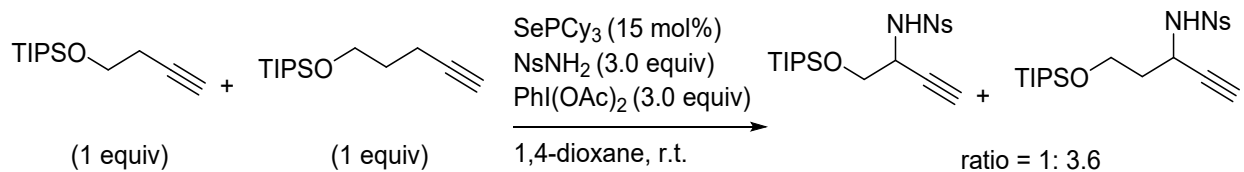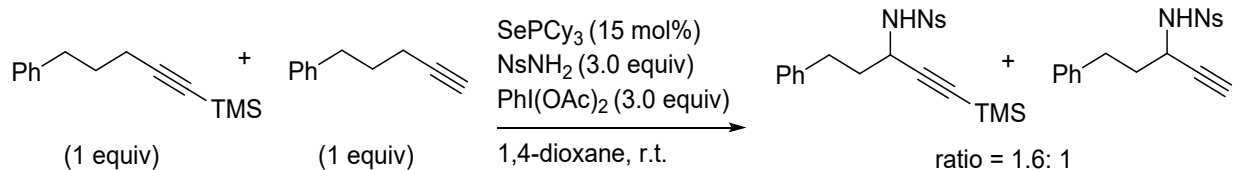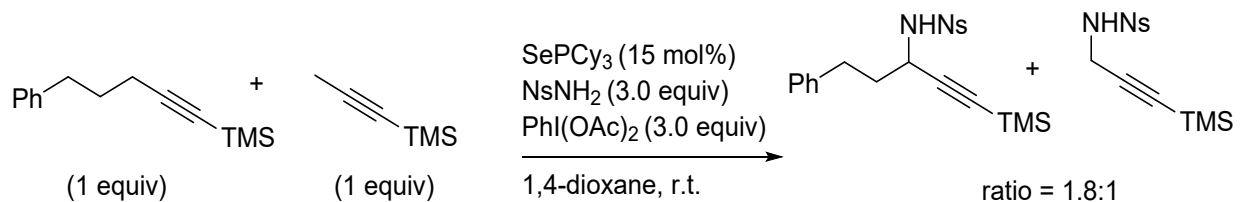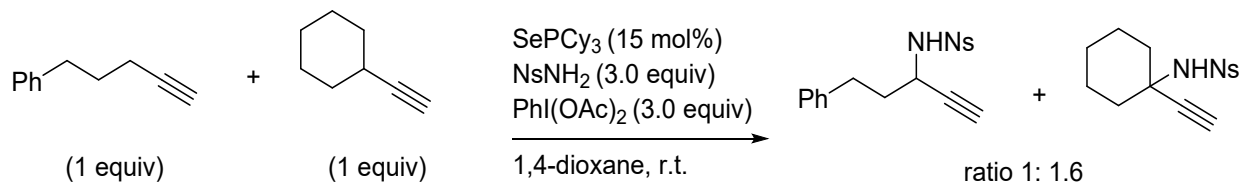

### Stereochemistry Retention:

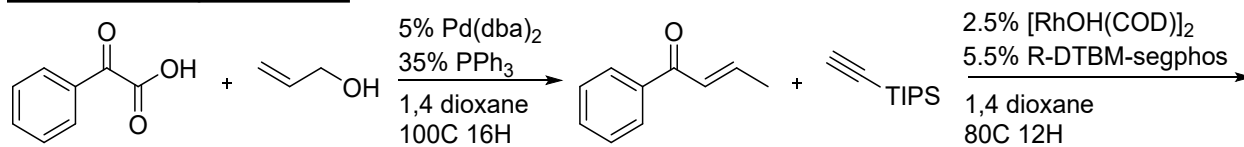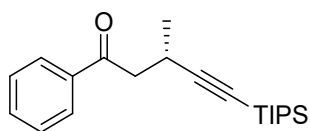

**8:** A 25 ml flame dried round-bottomed flask was charged with bis(dibenzylideneacetone)palladium(0) (28.8 mg, 0.05 mmol) and triphenylphosphine (91.8 mg, 0.35 mmol). A solution of the carboxylic acid (1.0 mmol) in 1,4-dioxane (8 mL) and allyl alcohol (104  $\mu$ L, 1.5 mmol) were added via syringe. The reaction mixture was stirred at 100  $^{\circ}$ C for 16 h and was then cooled to room temperature. The solvent was

removed and the remaining residue was further purified by flash chromatography (90:10 hexane/ethyl acetate), giving (*E*)-1-phenylbut-2-en-1-one in 89% yield (130 mg)<sup>ref</sup>

A mixture of [Rh(OH)(COD)]<sub>2</sub> (10 mg, 0.022 mmol) and (*R*)-DTBM-Segphos (58.5 mg, 0.05 mmol) in 1,4-dioxane (2.0 mL) was stirred at room temperature for 5 min. Triisopropylsilylacetylene (328.5 mg, 0.18 mmol) and enone (0.89 mmol) were then added, and the mixture was stirred at 80 °C for 12 h. After cooling, the mixture was passed through a short column of silica gel with ethyl acetate and concentrated under vacuum. The resulting residue was subjected to column chromatography (95:5 hexane/ethyl acetate) to give compound in 74% yield (216 mg). The NMR spectrum was consistent with literature values.<sup>2</sup>

HPLC (Chiralcel AD, 100% hexanes, 0.75 ml/min): 22.3 and 26.9 min, 84% ee.

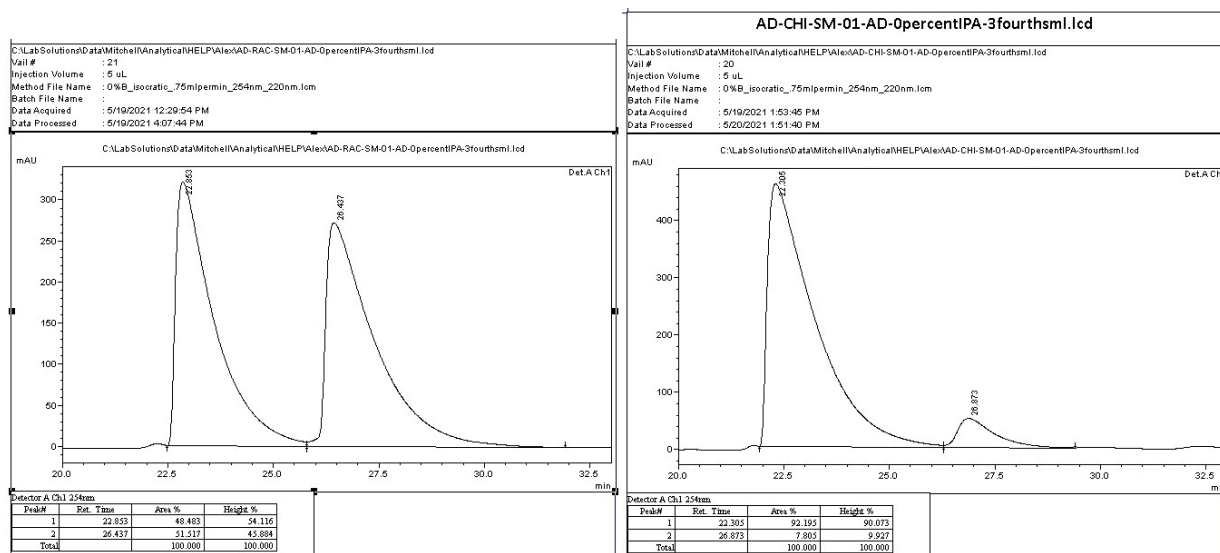

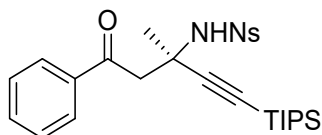

**9:** Prepared according to amination conditions with 2 equiv. benzoic acid in toluene at 35 °C. Purified by silica gel chromatography (90:10 hexanes/ethyl acetate) to afford the product as a liquid (84 mg, 79%).

**<sup>1</sup>H NMR** (500 MHz, CDCl<sub>3</sub>) δ 8.29 (d, *J* = 8.9 Hz, 2H), 8.14 (d, *J* = 8.8 Hz, 2H), 7.93–7.87 (m, 2H), 7.60 (t, *J* = 7.5 Hz, 1H), 7.47 (t, *J* = 7.5 Hz, 2H), 6.94 (s, 1H), 3.65 (d, *J* = 17.0 Hz, 1H), 3.26 (d, *J* = 17.0 Hz, 1H), 0.9–0.8 (m, 18H), 0.80–0.71 (m, 3H).

**<sup>13</sup>C NMR** (126 MHz, CDCl<sub>3</sub>) δ 198.63, 149.94, 147.85, 136.67, 134.21, 128.93, 128.71, 128.35, 124.19, 106.74, 86.52, 52.38, 49.78, 29.29, 18.45, 11.06.

**IR** (thin film): 3289, 2943, 2865, 1678, 1597, 1531, 1449, 1349, 1226, 1166, 1094, 998, 882, 854, 736, 685, 610 cm<sup>-1</sup>.

**MS** (ESI positive mode): *m/z* 529.4 [M+H]<sup>+</sup>

**HPLC** (Chiralcel AD, 50% isopropanol/hexanes, 5 mL/min): 9.2 and 10.2 min, 84% ee.

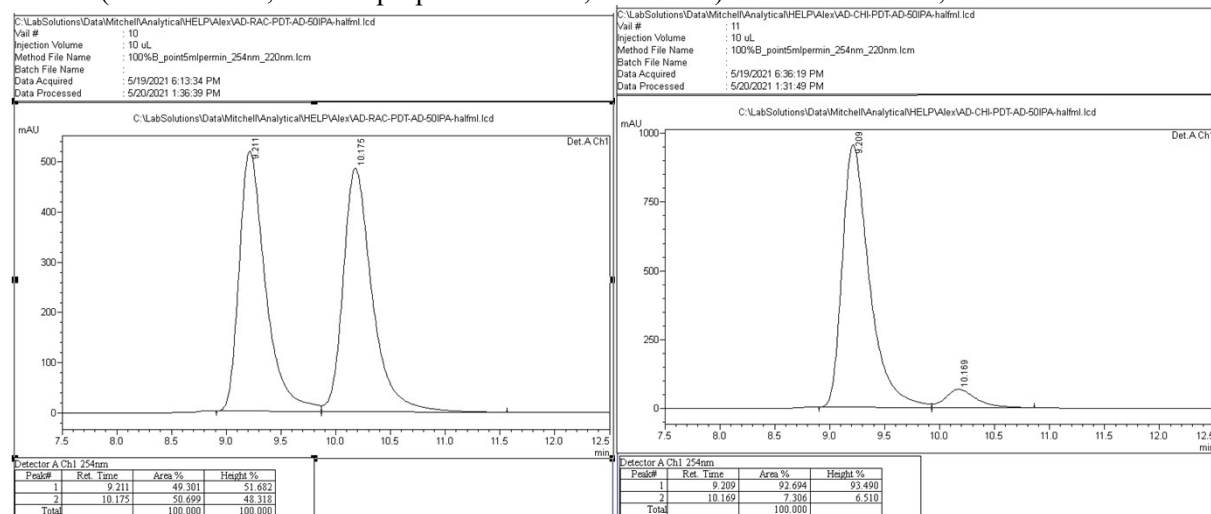

**Intramolecular competition KIE:** 3-deuterio-5-phenyl-1-pentyne was subjected to the standard propargyl amination conditions. Upon consumption of the starting material the product was purified by silica gel chromatography (85:15 hexanes/ethyl acetate). The KIE was determined by product ratio using <sup>1</sup>H NMR spectroscopy.

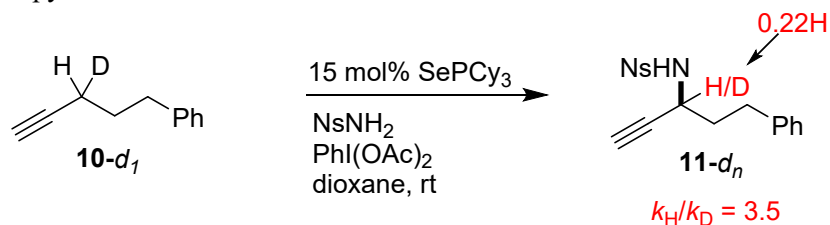

**One-pot Inter-molecular competition KIE:** A 1:1 mixture of 5-phenyl-1-pentyne and 3,3-dideuterio-5-phenyl-1-pentyne was subjected to the standard propargyl amination conditions. After 15% conversion the product was purified by silica gel chromatography (85:15 hexanes/ethyl acetate). The KIE was determined by product ratio using <sup>1</sup>H NMR spectroscopy.

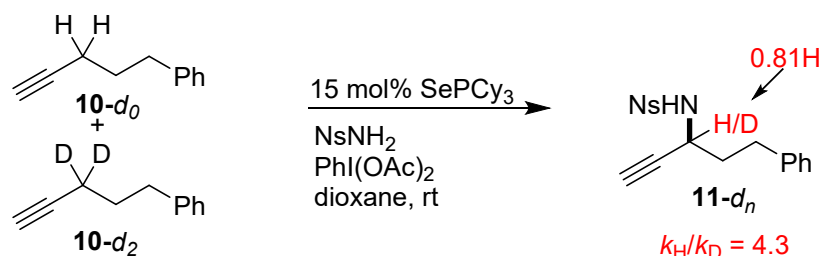

### DFT Calculations:

DFT calculations were performed using the Gaussian-16 software package. Structures were optimized at the  $\omega$ B97-XD/6-311++G(d,p) level of theory using the PCM model with  $\text{CH}_2\text{Cl}_2$  as solvent. Frequency calculations were performed on all structures and enthalpies and free energies were calculated using the harmonic approximation and adjusted from 1 atm to 1 M concentration (by adding  $RT \ln(24.46) = 1.9$  kcal/mol for each species). All minimum structures had zero negative frequencies, and all transition states had one negative frequency whose motions corresponded to the expected reaction coordinate.

### Summary Table

| alkyne                                                                | $\Delta G^\ddagger$ (kcal/mol) | $\Delta G_{\text{rxn}}$ (kcal/mol) | NBO $\Delta q$ on internal C |
|-----------------------------------------------------------------------|--------------------------------|------------------------------------|------------------------------|
| HCCCH <sub>3</sub>                                                    | +16.5                          | -16.5                              | 0.25                         |
| HCCCH <sub>2</sub> CH <sub>3</sub>                                    | +14.4                          | -21.2                              | 0.27                         |
| HCCCH(CH <sub>3</sub> ) <sub>2</sub>                                  | +12.2                          | -25.0                              | 0.27                         |
| HCCCH <sub>2</sub> CH <sub>2</sub> OAc                                | +16.5                          | -17.2                              | 0.27                         |
| HCCCH <sub>2</sub> CH <sub>2</sub> CH <sub>2</sub> OAc                | +15.2                          | -20.4                              | 0.26                         |
| HCCCH <sub>2</sub> CH <sub>2</sub> Si(CH <sub>3</sub> ) <sub>3</sub>  | +11.9                          | -24.0                              | 0.26                         |
| CH <sub>3</sub> CH <sub>2</sub> CCCH <sub>2</sub> CH <sub>3</sub>     | +13.5                          | -19.0                              | 0.26                         |
| CH <sub>3</sub> CH <sub>2</sub> CCCH <sub>2</sub> OAc                 | +15.9                          | -20.9                              | 0.23                         |
| CH <sub>3</sub> CH <sub>2</sub> CCCH <sub>2</sub> OAc                 | +18.5                          | -15.8                              | 0.21                         |
| CH <sub>3</sub> CH <sub>2</sub> CCCH <sub>2</sub> CH <sub>2</sub> OAc | +15.1                          | -17.9                              | 0.26                         |
| CH <sub>3</sub> CH <sub>2</sub> CCCH <sub>2</sub> CH <sub>2</sub> OAc | +17.2                          | -14.5                              | 0.26                         |

Bond lengths for ene reaction of propyne with selenium bis(imide):

Starting alkyne: C1-C2: 1.201, C2-C3: 1.458

Transition state: C1-C2: 1.248, C2-C3: 1.376

Product: C1-C2: 1.297, C2-C3 1.298

% of total bond distance change in TS: C1-C2: 49%, C2-C3: 51%

### Calculated structures and energies

Se(NSO<sub>2</sub>Me)<sub>2</sub>

|   |    |            |            |            |
|---|----|------------|------------|------------|
| 1 | Se | -0.0000010 | -0.2310520 | -0.2476140 |
| 2 | N  | -1.3033390 | 0.3996440  | 0.6405580  |
| 3 | N  | 1.3033400  | 0.3996520  | 0.6405490  |
| 4 | S  | -2.8301700 | -0.0717300 | 0.0941810  |
| 5 | C  | -3.5650560 | 1.5084880  | -0.2412960 |
| 6 | O  | -3.5020400 | -0.6890570 | 1.2200750  |



|    |   |            |            |            |
|----|---|------------|------------|------------|
| 7  | O | -2.7134770 | -0.8315000 | -1.1470280 |
| 8  | S | 2.8301680  | -0.0717310 | 0.0941770  |
| 9  | C | 3.5650730  | 1.5084870  | -0.2412640 |
| 10 | O | 2.7134770  | -0.8314780 | -1.1470460 |
| 11 | O | 3.5020240  | -0.6890860 | 1.2200650  |
| 12 | H | 4.5925080  | 1.3071310  | -0.5444550 |
| 13 | H | 3.5380790  | 2.0988860  | 0.6721990  |
| 14 | H | 3.0087570  | 1.9855690  | -1.0455650 |
| 15 | H | -4.5924820 | 1.3071350  | -0.5445200 |
| 16 | H | -3.0087120 | 1.9855610  | -1.0455830 |
| 17 | H | -3.5380880 | 2.0988950  | 0.6721630  |

Energy = -3687.9672

Enthalpy = -3687.8486

Free Energy (1 M) = -3687.9035

# of imaginary frequencies: 0

#### Propyne

|   |   |            |            |            |
|---|---|------------|------------|------------|
| 1 | C | 0.2185030  | -0.0000190 | -0.0001530 |
| 2 | C | -1.2398510 | 0.0000030  | 0.0000260  |
| 3 | H | -1.6252880 | -0.7018130 | -0.7426250 |
| 4 | H | -1.6249880 | -0.2923100 | 0.9792580  |
| 5 | H | -1.6250880 | 0.9941930  | -0.2363100 |
| 6 | C | 1.4197980  | 0.0000010  | 0.0000670  |
| 7 | H | 2.4846610  | 0.0000170  | 0.0000410  |

Energy = -116.6457

Enthalpy = -116.5858

Free Energy (1 M) = -116.6139

# of imaginary frequencies: 0

#### Propyne ene TS

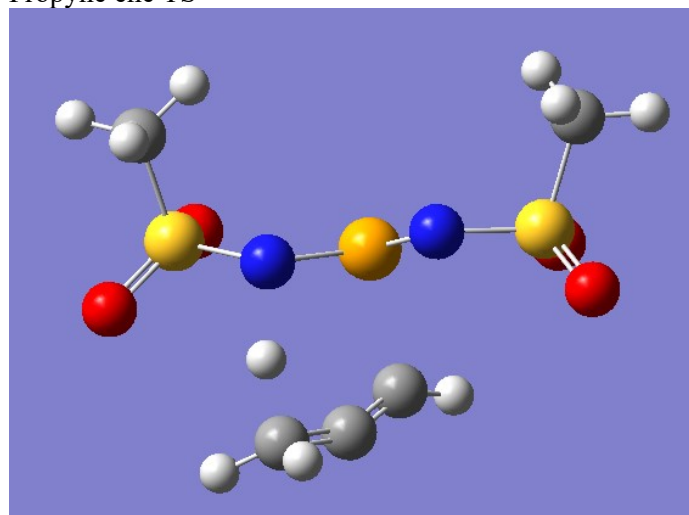

|   |    |            |            |            |
|---|----|------------|------------|------------|
| 1 | Se | 0.1054620  | -0.1530230 | 0.4561650  |
| 2 | N  | -1.2613940 | -0.0673260 | -0.6492590 |
| 3 | N  | 1.3353270  | -0.3019500 | -0.7760130 |

|    |   |            |            |            |
|----|---|------------|------------|------------|
| 4  | S | -2.7460210 | -0.5029740 | -0.0017750 |
| 5  | C | -3.0341590 | -2.0999180 | -0.7277710 |
| 6  | O | -3.7155980 | 0.4343570  | -0.5440550 |
| 7  | O | -2.6550930 | -0.6512460 | 1.4480830  |
| 8  | S | 2.8565490  | -0.2180280 | -0.1652440 |
| 9  | C | 3.5376130  | -1.8299660 | -0.4912760 |
| 10 | O | 2.8011600  | -0.0219300 | 1.2950150  |
| 11 | O | 3.6280790  | 0.7511850  | -0.9322940 |
| 12 | H | 4.5741060  | -1.8121680 | -0.1556290 |
| 13 | H | 3.4822720  | -2.0119420 | -1.5630210 |
| 14 | H | 2.9603260  | -2.5672210 | 0.0633540  |
| 15 | H | -4.0212740 | -2.4184200 | -0.3935270 |
| 16 | H | -2.2661130 | -2.7862250 | -0.3764880 |
| 17 | H | -3.0046100 | -1.9913200 | -1.8099950 |
| 18 | C | 0.2954940  | 1.9754230  | 0.9816150  |
| 19 | C | -0.3706940 | 2.5475700  | 0.0948440  |
| 20 | C | -1.2121820 | 2.6364910  | -0.9904510 |
| 21 | H | 0.9623420  | 2.0950890  | 1.8150820  |
| 22 | H | -1.3381190 | 1.3858290  | -1.0422630 |
| 23 | H | -0.7668210 | 2.9494550  | -1.9321770 |
| 24 | H | -2.2186210 | 3.0041330  | -0.8015180 |

Energy = -3804.6050

Enthalpy = -3804.4279

Free Energy (1 M) = -4910

# of imaginary frequencies: 1

Propyne ene product

|    |    |            |            |            |
|----|----|------------|------------|------------|
| 1  | Se | -0.1806180 | 0.7302140  | -0.5644850 |
| 2  | N  | 0.8274570  | -0.3710750 | 0.5543680  |
| 3  | N  | -1.6537920 | 0.9613960  | 0.3595770  |
| 4  | S  | 2.1410420  | -1.2294280 | -0.0243960 |
| 5  | C  | 1.5216720  | -2.8897280 | -0.1400810 |
| 6  | O  | 3.1682410  | -1.1757590 | 0.9974990  |
| 7  | O  | 2.4078220  | -0.7337320 | -1.3638900 |
| 8  | S  | -2.7891710 | -0.1935060 | 0.0890820  |
| 9  | C  | -2.6184730 | -1.3126750 | 1.4676630  |
| 10 | O  | -2.5039660 | -0.9598990 | -1.1325520 |
| 11 | O  | -4.0946660 | 0.4452510  | 0.1967000  |
| 12 | H  | -3.3800820 | -2.0840030 | 1.3572000  |
| 13 | H  | -2.7682820 | -0.7483400 | 2.3861740  |
| 14 | H  | -1.6190250 | -1.7452290 | 1.4330310  |
| 15 | H  | 2.3369720  | -3.5068500 | -0.5164140 |
| 16 | H  | 0.6810940  | -2.8924280 | -0.8319010 |
| 17 | H  | 1.2186390  | -3.2089100 | 0.8553160  |

|    |   |            |            |            |
|----|---|------------|------------|------------|
| 18 | C | 0.5899690  | 2.4270860  | -0.0812670 |
| 19 | C | 1.8137220  | 2.4831130  | 0.3458850  |
| 20 | C | 3.0343490  | 2.4896480  | 0.7876870  |
| 21 | H | -0.0750780 | 3.2645030  | -0.2516260 |
| 22 | H | 0.9228250  | -0.0511110 | 1.5144650  |
| 23 | H | 3.2402850  | 2.4233180  | 1.8505280  |
| 24 | H | 3.8711940  | 2.5649300  | 0.1017420  |

Energy = -3804.6607

Enthalpy = -3804.4779

Free Energy (1 M) = -3804.5437

# of imaginary frequencies: 0

Butyne

|    |   |            |            |            |
|----|---|------------|------------|------------|
| 1  | C | -1.9565610 | -0.2616900 | -0.0001020 |
| 2  | C | -0.8305030 | 0.1588640  | -0.0001110 |
| 3  | C | 0.5478490  | 0.6478450  | 0.0000540  |
| 4  | H | -2.9557990 | -0.6299600 | 0.0006740  |
| 5  | H | 0.6929380  | 1.2859310  | 0.8768820  |
| 6  | C | 1.5802580  | -0.4852960 | 0.0000030  |
| 7  | H | 1.4666760  | -1.1147510 | -0.8851290 |
| 8  | H | 2.5904100  | -0.0706510 | 0.0002190  |
| 9  | H | 1.4664220  | -1.1150660 | 0.8848780  |
| 10 | H | 0.6930960  | 1.2861570  | -0.8765850 |

Energy = -155.9573

Enthalpy = -155.8663

Free Energy (1 M) = -155.8990

# of imaginary frequencies: 0

Butyne ene TS

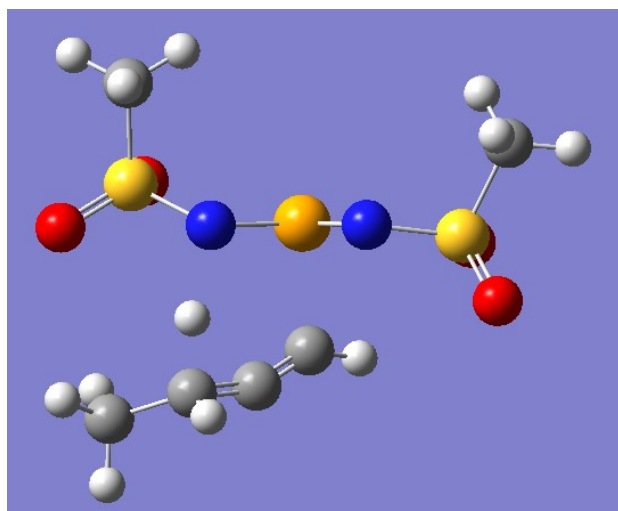

|    |    |            |            |            |
|----|----|------------|------------|------------|
| 1  | Se | 0.2847740  | -0.2908800 | 0.4573160  |
| 2  | N  | -1.1024270 | -0.3113810 | -0.6237260 |
| 3  | N  | 1.5094600  | -0.2362450 | -0.7893110 |
| 4  | S  | -2.4844290 | -1.0236290 | -0.0100070 |
| 5  | C  | -2.4006230 | -2.6929190 | -0.6210170 |
| 6  | O  | -3.5947600 | -0.3510910 | -0.6635770 |
| 7  | O  | -2.4523170 | -1.0578210 | 1.4506320  |
| 8  | S  | 3.0193020  | -0.0023970 | -0.1924900 |
| 9  | C  | 3.8801610  | -1.5066000 | -0.5997370 |
| 10 | O  | 2.9679460  | 0.1219860  | 1.2760880  |
| 11 | O  | 3.6613700  | 1.0831230  | -0.9227240 |
| 12 | H  | 4.9125120  | -1.3809440 | -0.2743510 |
| 13 | H  | 3.8299040  | -1.6455720 | -1.6781610 |
| 14 | H  | 3.4035400  | -2.3319490 | -0.0744240 |
| 15 | H  | -3.3279690 | -3.1793900 | -0.3192740 |
| 16 | H  | -1.5422490 | -3.1898200 | -0.1725970 |
| 17 | H  | -2.3155820 | -2.6545000 | -1.7049840 |
| 18 | C  | 0.2552290  | 1.8092490  | 1.0731390  |
| 19 | C  | -0.5416060 | 2.3586560  | 0.2843330  |
| 20 | C  | -1.4910190 | 2.4381930  | -0.7170040 |
| 21 | H  | 0.9876120  | 1.9702550  | 1.8430260  |
| 22 | H  | -1.4278470 | 1.2092470  | -0.8631460 |
| 23 | C  | -2.9233660 | 2.8237310  | -0.3764470 |
| 24 | H  | -3.0035170 | 3.9087300  | -0.2900690 |
| 25 | H  | -3.5883490 | 2.4825920  | -1.1685170 |
| 26 | H  | -3.2397390 | 2.3673730  | 0.5615830  |
| 27 | H  | -1.1084020 | 2.8322330  | -1.6595790 |

Energy = -3843.9202

Enthalpy = -3843.7125

Free Energy (1 M) = -3843.7795

# of imaginary frequencies: 1

Butyne ene product

|    |    |            |            |            |
|----|----|------------|------------|------------|
| 1  | Se | 0.3509840  | -0.6079530 | -0.5966700 |
| 2  | N  | -0.5197240 | 0.5933920  | 0.5443170  |
| 3  | N  | 1.7599870  | -1.0543470 | 0.3489300  |
| 4  | S  | -1.8062020 | 1.5087070  | -0.0193290 |
| 5  | C  | -1.0987560 | 3.1269650  | -0.1962850 |
| 6  | O  | -2.8030900 | 1.5360170  | 1.0338300  |
| 7  | O  | -2.1457910 | 1.0013800  | -1.3385980 |
| 8  | S  | 3.0621400  | -0.0844110 | 0.1077360  |
| 9  | C  | 3.0614540  | 1.0128520  | 1.5144740  |
| 10 | O  | 2.9102940  | 0.7460590  | -1.0956130 |
| 11 | O  | 4.2526550  | -0.9205230 | 0.2033880  |
| 12 | H  | 3.9385250  | 1.6534620  | 1.4277510  |
| 13 | H  | 3.1109790  | 0.4085510  | 2.4183490  |
| 14 | H  | 2.1457730  | 1.6023120  | 1.4881300  |
| 15 | H  | -1.8876920 | 3.7759320  | -0.5752230 |
| 16 | H  | -0.2749680 | 3.0629590  | -0.9050990 |
| 17 | H  | -0.7563640 | 3.4581660  | 0.7821020  |
| 18 | C  | -0.6632820 | -2.1978430 | -0.1847990 |
| 19 | C  | -1.8428340 | -2.0875100 | 0.3431230  |
| 20 | C  | -3.0124050 | -1.8943350 | 0.8811610  |
| 21 | H  | -0.1585960 | -3.1084480 | -0.4836300 |
| 22 | H  | -0.6666810 | 0.2371900  | 1.4858810  |
| 23 | C  | -4.2770030 | -1.6615330 | 0.1097910  |
| 24 | H  | -5.0321350 | -2.3980520 | 0.3946300  |
| 25 | H  | -4.6670030 | -0.6702110 | 0.3552300  |
| 26 | H  | -4.1073050 | -1.7167110 | -0.9650030 |
| 27 | H  | -3.0704120 | -1.8918530 | 1.9675880  |

Energy = -3843.9798

Enthalpy = -3843.7668

Free Energy (1 M) = -3843.8363

# of imaginary frequencies: 0

Isopropylacetylene

|    |   |            |            |            |
|----|---|------------|------------|------------|
| 1  | C | 2.2244490  | 0.0000840  | 0.1191510  |
| 2  | C | 1.0471290  | 0.0000410  | -0.1249140 |
| 3  | C | -0.3936810 | 0.0000340  | -0.4016770 |
| 4  | H | 3.2681860  | 0.0000730  | 0.3306360  |
| 5  | H | -0.5127670 | 0.0000240  | -1.4910400 |
| 6  | C | -1.0556120 | -1.2687390 | 0.1535770  |
| 7  | H | -0.9593750 | -1.3057570 | 1.2421350  |
| 8  | H | -2.1191470 | -1.2728220 | -0.0979010 |
| 9  | H | -0.5981900 | -2.1683240 | -0.2632530 |
| 10 | C | -1.0558110 | 1.2686290  | 0.1535940  |
| 11 | H | -0.5988300 | 2.1683210  | -0.2634950 |
| 12 | H | -2.1194190 | 1.2723300  | -0.0975870 |
| 13 | H | -0.9593050 | 1.3058620  | 1.2421190  |

Energy = -195.2708

Enthalpy = -195.1504

Free Energy (1 M) = -195.1863

# of imaginary frequencies: 0

#### Isopropylacetylene ene TS

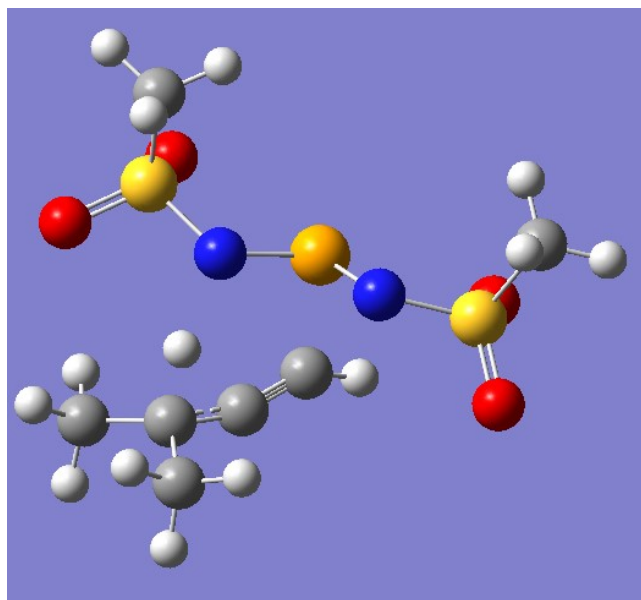

|   |    |            |            |            |
|---|----|------------|------------|------------|
| 1 | Se | 0.3547310  | -0.5343550 | 0.4598120  |
| 2 | N  | -1.0486930 | -0.4175680 | -0.5863340 |
| 3 | N  | 1.5498720  | -0.1818660 | -0.7648540 |
| 4 | S  | -2.3898640 | -1.2770720 | -0.0870420 |
| 5 | C  | -2.2874310 | -2.7867340 | -1.0245110 |
| 6 | O  | -3.5415170 | -0.5242680 | -0.5567410 |

|    |   |            |            |            |
|----|---|------------|------------|------------|
| 7  | O | -2.3066640 | -1.6037490 | 1.3356340  |
| 8  | S | 3.0603850  | 0.0083970  | -0.1547330 |
| 9  | C | 3.9752900  | -1.3528420 | -0.8472580 |
| 10 | O | 3.0383450  | -0.1441650 | 1.3115330  |
| 11 | O | 3.6367060  | 1.2396810  | -0.6799790 |
| 12 | H | 5.0088160  | -1.2422500 | -0.5202870 |
| 13 | H | 3.9052200  | -1.2928420 | -1.9318480 |
| 14 | H | 3.5461730  | -2.2816940 | -0.4762370 |
| 15 | H | -3.1904860 | -3.3535910 | -0.7993270 |
| 16 | H | -1.4005420 | -3.3355960 | -0.7125580 |
| 17 | H | -2.2428070 | -2.5285530 | -2.0805120 |
| 18 | C | 0.2456510  | 1.4160660  | 1.4799930  |
| 19 | C | -0.5729000 | 2.0776180  | 0.8110520  |
| 20 | C | -1.5250720 | 2.3288370  | -0.1712820 |
| 21 | H | 0.9687500  | 1.4402030  | 2.2743660  |
| 22 | H | -1.4509290 | 1.1588560  | -0.5033960 |
| 23 | C | -2.9574730 | 2.5703970  | 0.2955550  |
| 24 | H | -3.0706830 | 3.6117750  | 0.6054270  |
| 25 | H | -3.6415090 | 2.3724100  | -0.5296970 |
| 26 | H | -3.2223520 | 1.9186320  | 1.1279870  |
| 27 | C | -1.0764410 | 3.1467830  | -1.3785320 |
| 28 | H | -0.0599690 | 2.8908470  | -1.6780670 |
| 29 | H | -1.7509830 | 2.9514590  | -2.2135560 |
| 30 | H | -1.1208460 | 4.2124940  | -1.1428840 |

Energy = -3883.2370

Enthalpy = -3882.9994

Free Energy (1 M) = -3883.0703

# of imaginary frequencies: 1

Isopropylacetylene ene product

|   |    |            |            |            |
|---|----|------------|------------|------------|
| 1 | Se | 0.5116160  | -0.5003060 | -0.7287480 |
| 2 | N  | -0.3413980 | 0.6377720  | 0.4900050  |
| 3 | N  | 1.8286680  | -1.1478930 | 0.2346090  |
| 4 | S  | -1.5081390 | 1.7173750  | -0.0372170 |
| 5 | C  | -0.6885520 | 3.2870360  | 0.0886390  |
| 6 | O  | -2.5978320 | 1.6729000  | 0.9200730  |
| 7 | O  | -1.7528250 | 1.4286620  | -1.4405950 |
| 8 | S  | 3.1994940  | -0.2473310 | 0.1840980  |
| 9 | C  | 3.1629380  | 0.6983700  | 1.6965430  |

|    |   |            |            |            |
|----|---|------------|------------|------------|
| 10 | O | 3.1864170  | 0.7115050  | -0.9301010 |
| 11 | O | 4.3288680  | -1.1660450 | 0.2672940  |
| 12 | H | 4.0770220  | 1.2902190  | 1.7329350  |
| 13 | H | 3.1178670  | 0.0030710  | 2.5326740  |
| 14 | H | 2.2838860  | 1.3414720  | 1.6753340  |
| 15 | H | -1.4002280 | 4.0425090  | -0.2429310 |
| 16 | H | 0.1864370  | 3.2670770  | -0.5587270 |
| 17 | H | -0.4104460 | 3.4429090  | 1.1292300  |
| 18 | C | -0.6392960 | -2.0425070 | -0.5381700 |
| 19 | C | -1.8556070 | -1.8770090 | -0.1195630 |
| 20 | C | -3.0507220 | -1.6067380 | 0.3310080  |
| 21 | H | -0.1604930 | -2.9615440 | -0.8538490 |
| 22 | H | -0.5778380 | 0.1947020  | 1.3745460  |
| 23 | C | -4.1693830 | -1.2277560 | -0.5999560 |
| 24 | H | -5.0116540 | -1.9124200 | -0.4664330 |
| 25 | H | -4.5128650 | -0.2206670 | -0.3464330 |
| 26 | H | -3.8570920 | -1.2416250 | -1.6434290 |
| 27 | C | -3.3552110 | -1.6390730 | 1.8040990  |
| 28 | H | -2.4915320 | -1.9426300 | 2.3957820  |
| 29 | H | -3.6731550 | -0.6414850 | 2.1199660  |
| 30 | H | -4.1794500 | -2.3311710 | 1.9974150  |

Energy = -3883.3000

Enthalpy = -3883.0573

Free Energy (1 M) = -3883.1297

# of imaginary frequencies: 0

HCCCH2CH2OAc

|    |   |            |            |            |
|----|---|------------|------------|------------|
| 1  | C | -3.9524690 | 0.3923150  | -0.0001010 |
| 2  | C | -2.8831190 | -0.1538170 | 0.0000100  |
| 3  | C | -1.5712370 | -0.7954440 | 0.0001080  |
| 4  | H | -4.9039750 | 0.8709900  | -0.0001390 |
| 5  | H | -1.4768800 | -1.4363500 | -0.8808350 |
| 6  | C | -0.4521830 | 0.2379630  | 0.0000500  |
| 7  | H | -0.4989210 | 0.8728960  | 0.8869630  |
| 8  | H | -0.4990490 | 0.8729430  | -0.8868270 |
| 9  | H | -1.4769220 | -1.4362310 | 0.8811460  |
| 10 | O | 0.7791570  | -0.4955340 | -0.0000550 |
| 11 | C | 1.9099340  | 0.2228370  | -0.0000720 |
| 12 | O | 1.9200520  | 1.4300600  | 0.0000610  |



|    |   |           |            |            |
|----|---|-----------|------------|------------|
| 13 | C | 3.1205300 | -0.6627880 | -0.0000400 |
| 14 | H | 3.1058800 | -1.3064750 | 0.8815430  |
| 15 | H | 3.1058690 | -1.3065670 | -0.8815540 |
| 16 | H | 4.0215910 | -0.0538230 | -0.0000720 |

Energy = -383.8339

Enthalpy = -383.6953

Free Energy (1 M) = -383.7410

# of imaginary frequencies: 0

HCCCH<sub>2</sub>CH<sub>2</sub>OAc ene TS

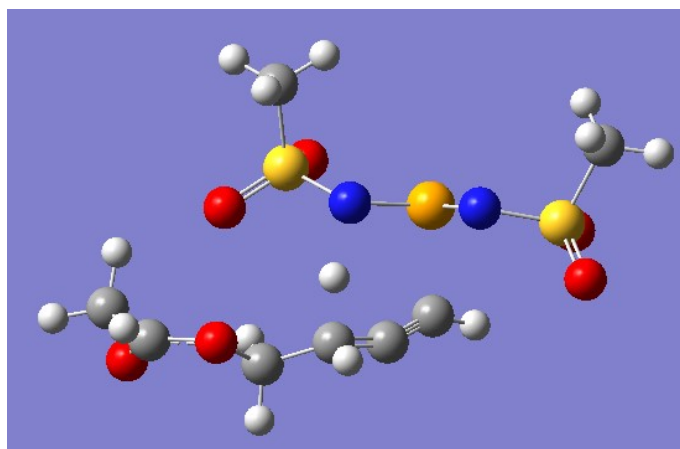

|    |    |            |            |            |
|----|----|------------|------------|------------|
| 1  | Se | -1.3022760 | 0.5187780  | 0.4547770  |
| 2  | N  | 0.2158990  | 0.6818520  | -0.4197270 |
| 3  | N  | -2.2139270 | -0.1520770 | -0.8732500 |
| 4  | S  | 1.2686150  | 1.8381020  | 0.1914890  |
| 5  | C  | 1.0784310  | 3.1814790  | -0.9573680 |
| 6  | O  | 2.6058410  | 1.2900050  | 0.0452360  |
| 7  | O  | 0.8358270  | 2.2777890  | 1.5149640  |
| 8  | S  | -3.7033540 | -0.6795600 | -0.4231290 |
| 9  | C  | -4.8164140 | 0.3865010  | -1.3129340 |
| 10 | O  | -3.8976560 | -0.4580380 | 1.0211810  |
| 11 | O  | -3.8977340 | -2.0367410 | -0.9154540 |
| 12 | H  | -5.8277830 | 0.0456330  | -1.0930330 |
| 13 | H  | -4.5999410 | 0.2932340  | -2.3756100 |
| 14 | H  | -4.6646190 | 1.4075930  | -0.9682670 |
| 15 | H  | 1.7858880  | 3.9522070  | -0.6523770 |
| 16 | H  | 0.0554550  | 3.5486270  | -0.8994440 |
| 17 | H  | 1.3104640  | 2.8095820  | -1.9532280 |
| 18 | C  | -0.8647940 | -1.3195010 | 1.6099300  |

|    |   |            |            |            |
|----|---|------------|------------|------------|
| 19 | C | 0.1114410  | -1.8035530 | 1.0051510  |
| 20 | C | 1.1299860  | -1.8516080 | 0.0756760  |
| 21 | H | -1.6205710 | -1.4690340 | 2.3584990  |
| 22 | H | 0.8392790  | -0.6929130 | -0.3320300 |
| 23 | C | 2.5689860  | -1.8075570 | 0.5525640  |
| 24 | H | 2.8712760  | -2.7732930 | 0.9631070  |
| 25 | H | 2.7119870  | -1.0342330 | 1.3076390  |
| 26 | H | 0.9473910  | -2.5124410 | -0.7724360 |
| 27 | O | 3.3473860  | -1.5126960 | -0.6041790 |
| 28 | C | 4.6037120  | -1.0932540 | -0.3896560 |
| 29 | O | 5.1064360  | -1.0666710 | 0.7063420  |
| 30 | C | 5.2555220  | -0.6583320 | -1.6661630 |
| 31 | H | 6.3291820  | -0.5636740 | -1.5196030 |
| 32 | H | 5.0389000  | -1.3621060 | -2.4701330 |
| 33 | H | 4.8404830  | 0.3130130  | -1.9463670 |

Energy = -4071.7940

Enthalpy = -4071.5393

Free Energy (1 M) = -4071.6182

# of imaginary frequencies: 1

HCCCH<sub>2</sub>CH<sub>2</sub>OAc ene product

|    |    |            |            |            |
|----|----|------------|------------|------------|
| 1  | Se | 1.2375260  | -0.6338990 | -0.5797070 |
| 2  | N  | 0.3439840  | 0.5488930  | 0.5572410  |
| 3  | N  | 2.6771170  | -1.0217640 | 0.3425630  |
| 4  | S  | -0.9407970 | 1.4775770  | 0.0024390  |
| 5  | C  | -0.1333110 | 2.9395660  | -0.5976350 |
| 6  | O  | -1.7239100 | 1.8062190  | 1.1777990  |
| 7  | O  | -1.5565190 | 0.7919860  | -1.1212530 |
| 8  | S  | 3.9258710  | 0.0146800  | 0.0808790  |
| 9  | C  | 3.9016560  | 1.0986180  | 1.4969440  |
| 10 | O  | 3.6988050  | 0.8445350  | -1.1110710 |
| 11 | O  | 5.1575710  | -0.7616600 | 0.1402260  |
| 12 | H  | 4.7448280  | 1.7815080  | 1.3972330  |
| 13 | H  | 3.9996330  | 0.4903650  | 2.3941630  |
| 14 | H  | 2.9582340  | 1.6431770  | 1.4941660  |
| 15 | H  | -0.9167950 | 3.5942170  | -0.9780800 |
| 16 | H  | 0.5505200  | 2.6576990  | -1.3969620 |
| 17 | H  | 0.3955100  | 3.4006170  | 0.2338660  |
| 18 | C  | 0.2964010  | -2.2622610 | -0.1649340 |

|    |   |            |            |            |
|----|---|------------|------------|------------|
| 19 | C | -0.8613640 | -2.2127480 | 0.4143940  |
| 20 | C | -2.0279950 | -2.1068160 | 0.9781340  |
| 21 | H | 0.8040100  | -3.1500090 | -0.5219930 |
| 22 | H | 0.2031210  | 0.2070990  | 1.5052660  |
| 23 | C | -3.2829790 | -1.9084430 | 0.1783320  |
| 24 | H | -3.9634580 | -2.7539000 | 0.3092230  |
| 25 | H | -3.0620930 | -1.7853870 | -0.8810110 |
| 26 | H | -2.1101220 | -2.1572420 | 2.0603570  |
| 27 | O | -3.9017520 | -0.7255400 | 0.6931680  |
| 28 | C | -4.7175960 | -0.0495040 | -0.1307390 |
| 29 | O | -5.0163540 | -0.4434420 | -1.2312620 |
| 30 | C | -5.1767600 | 1.2274610  | 0.5042580  |
| 31 | H | -5.6989040 | 1.0089670  | 1.4378330  |
| 32 | H | -4.3029110 | 1.8361190  | 0.7459140  |
| 33 | H | -5.8373680 | 1.7613080  | -0.1750520 |

Energy = -4071.8524

Enthalpy = -4071.5918

Free Energy (1 M) = -4071.6720

# of imaginary frequencies: 0

HCCCH<sub>2</sub>CH<sub>2</sub>CH<sub>2</sub>OAc

|    |   |            |            |            |
|----|---|------------|------------|------------|
| 1  | C | -4.6135220 | -0.6244200 | 0.0003690  |
| 2  | C | -3.5748160 | -0.0208040 | -0.0002010 |
| 3  | C | -2.2999100 | 0.6922650  | -0.0001830 |
| 4  | H | -5.5367730 | -1.1553400 | 0.0000720  |
| 5  | H | -2.2601270 | 1.3452800  | 0.8777630  |
| 6  | C | -1.0968300 | -0.2607640 | -0.0000630 |
| 7  | H | -1.1377460 | -0.9052150 | -0.8820460 |
| 8  | H | -1.1379250 | -0.9052180 | 0.8819020  |
| 9  | H | -2.2600510 | 1.3451530  | -0.8782150 |
| 10 | C | 0.2036900  | 0.5160340  | 0.0000650  |
| 11 | H | 0.2923930  | 1.1506120  | 0.8858690  |
| 12 | H | 0.2923910  | 1.1509150  | -0.8855220 |
| 13 | O | 1.2744020  | -0.4409530 | -0.0000870 |
| 14 | C | 2.5211440  | 0.0433940  | -0.0001800 |
| 15 | O | 2.7689060  | 1.2258480  | 0.0002170  |
| 16 | C | 3.5376600  | -1.0604760 | 0.0000270  |
| 17 | H | 3.3980340  | -1.6895960 | 0.8812030  |
| 18 | H | 3.3989180  | -1.6889940 | -0.8817200 |

19 H 4.5399260 -0.6381340 0.0006560

Energy = -423.1476

Enthalpy = -422.9791

Free Energy (1 M) = -423.0293

# of imaginary frequencies: 0

HCCCH<sub>2</sub>CH<sub>2</sub>CH<sub>2</sub>OAc ene TS

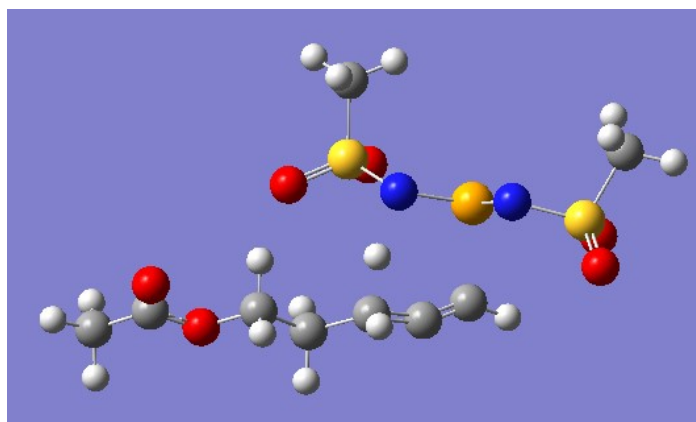

|    |    |            |            |            |
|----|----|------------|------------|------------|
| 1  | Se | -1.7174550 | 0.4816850  | 0.4309240  |
| 2  | N  | -0.1992810 | 0.7474930  | -0.4215380 |
| 3  | N  | -2.5480960 | -0.3076970 | -0.8881300 |
| 4  | S  | 0.7115830  | 2.0354480  | 0.1401710  |
| 5  | C  | 0.3131820  | 3.3441940  | -0.9961620 |
| 6  | O  | 2.1013860  | 1.6597160  | -0.0610520 |
| 7  | O  | 0.2846720  | 2.4294090  | 1.4804140  |
| 8  | S  | -4.0038180 | -0.9250180 | -0.4467450 |
| 9  | C  | -5.1800400 | 0.0397840  | -1.3713520 |
| 10 | O  | -4.2350290 | -0.6883320 | 0.9902250  |
| 11 | O  | -4.0989350 | -2.3021160 | -0.9128690 |
| 12 | H  | -6.1657280 | -0.3756380 | -1.1636170 |
| 13 | H  | -4.9380330 | -0.0511220 | -2.4286990 |
| 14 | H  | -5.1157370 | 1.0745880  | -1.0401670 |
| 15 | H  | 0.9442900  | 4.1905240  | -0.7259100 |
| 16 | H  | -0.7394860 | 3.5967030  | -0.8833430 |
| 17 | H  | 0.5338460  | 2.9984500  | -2.0039070 |
| 18 | C  | -1.1586000 | -1.2520420 | 1.6456540  |
| 19 | C  | -0.1060100 | -1.6663670 | 1.1173650  |
| 20 | C  | 0.9700020  | -1.6593420 | 0.2540190  |
| 21 | H  | -1.9299180 | -1.4625240 | 2.3636470  |
| 22 | H  | 0.5743300  | -0.5655370 | -0.2230810 |

|    |   |           |            |            |
|----|---|-----------|------------|------------|
| 23 | C | 2.3812930 | -1.4661770 | 0.7994890  |
| 24 | H | 2.6685680 | -2.3532330 | 1.3691290  |
| 25 | H | 2.4047540 | -0.6068080 | 1.4723120  |
| 26 | H | 0.8768810 | -2.3682720 | -0.5713610 |
| 27 | C | 3.3575900 | -1.2508630 | -0.3402420 |
| 28 | H | 3.0900110 | -0.3684170 | -0.9227230 |
| 29 | H | 3.3971800 | -2.1192220 | -1.0032860 |
| 30 | O | 4.6459420 | -1.0521870 | 0.2560780  |
| 31 | C | 5.6627170 | -0.7959060 | -0.5756610 |
| 32 | O | 5.5363690 | -0.7535560 | -1.7759520 |
| 33 | C | 6.9403300 | -0.5666620 | 0.1764840  |
| 34 | H | 6.8477950 | 0.3428000  | 0.7742060  |
| 35 | H | 7.1282410 | -1.3962120 | 0.8598190  |
| 36 | H | 7.7658390 | -0.4620180 | -0.5238890 |

Energy = -4111.1106

Enthalpy = -4110.8256

Free Energy (1 M) = -4110.9086

# of imaginary frequencies: 1

HCCCH<sub>2</sub>CH<sub>2</sub>CH<sub>2</sub>OAc ene product

|    |    |            |            |            |
|----|----|------------|------------|------------|
| 1  | Se | 1.5812100  | -0.6587030 | -0.4754650 |
| 2  | N  | 0.8901730  | 0.6408980  | 0.6798840  |
| 3  | N  | 3.1137210  | -1.0545390 | 0.2804050  |
| 4  | S  | -0.4107090 | 1.5886070  | 0.2216470  |
| 5  | C  | 0.3346740  | 3.1622740  | -0.1208790 |
| 6  | O  | -1.2753170 | 1.7103890  | 1.3795450  |
| 7  | O  | -0.9239400 | 1.0321050  | -1.0200880 |
| 8  | S  | 4.3606330  | -0.1068280 | -0.2123700 |
| 9  | C  | 4.5480590  | 1.0909020  | 1.0961310  |
| 10 | O  | 4.0295160  | 0.6328820  | -1.4387490 |
| 11 | O  | 5.5592830  | -0.9360220 | -0.2267630 |
| 12 | H  | 5.3944020  | 1.7263150  | 0.8373030  |
| 13 | H  | 4.7353950  | 0.5549940  | 2.0247190  |
| 14 | H  | 3.6296690  | 1.6734300  | 1.1593190  |
| 15 | H  | -0.4663990 | 3.8275400  | -0.4415570 |
| 16 | H  | 1.0686410  | 3.0263910  | -0.9134530 |
| 17 | H  | 0.7996710  | 3.5236370  | 0.7943250  |
| 18 | C  | 0.6498780  | -2.1951740 | 0.2242720  |
| 19 | C  | -0.5470150 | -2.0527180 | 0.7035940  |

|    |   |            |            |            |
|----|---|------------|------------|------------|
| 20 | C | -1.7395390 | -1.8563740 | 1.1847440  |
| 21 | H | 1.2096800  | -3.1165360 | 0.1211990  |
| 22 | H | 0.8707080  | 0.3691590  | 1.6595600  |
| 23 | C | -2.9987500 | -1.9203470 | 0.3641790  |
| 24 | H | -3.6238540 | -2.7313020 | 0.7515560  |
| 25 | H | -2.7627900 | -2.1445930 | -0.6773980 |
| 26 | H | -1.8322710 | -1.6460090 | 2.2484950  |
| 27 | C | -3.7740540 | -0.6155870 | 0.4537310  |
| 28 | H | -3.2218740 | 0.2074500  | -0.0012790 |
| 29 | H | -3.9976260 | -0.3529310 | 1.4907110  |
| 30 | O | -5.0021990 | -0.8214350 | -0.2597980 |
| 31 | C | -5.8508460 | 0.2125510  | -0.3123380 |
| 32 | O | -5.6278140 | 1.2745330  | 0.2172250  |
| 33 | C | -7.0792890 | -0.1279110 | -1.1036310 |
| 34 | H | -6.7979990 | -0.3499390 | -2.1351270 |
| 35 | H | -7.5540120 | -1.0190740 | -0.6895250 |
| 36 | H | -7.7734540 | 0.7090920  | -1.0832850 |

Energy = -4111.1699

Enthalpy = -4110.8792

Free Energy (1 M) = -4110.9653

# of imaginary frequencies: 0

HCCCH<sub>2</sub>CH<sub>2</sub>Si(CH<sub>3</sub>)<sub>3</sub>

|    |    |            |            |            |
|----|----|------------|------------|------------|
| 1  | C  | -3.0702490 | 0.9139600  | -0.0136160 |
| 2  | C  | -2.4133650 | -0.0925610 | -0.0297140 |
| 3  | C  | -1.6077590 | -1.3134690 | -0.0558490 |
| 4  | H  | -3.6499300 | 1.8070730  | 0.0010180  |
| 5  | H  | -2.1952990 | -2.0996790 | -0.5407930 |
| 6  | C  | -0.2495090 | -1.1514980 | -0.7664330 |
| 7  | H  | 0.2398240  | -2.1323790 | -0.7739510 |
| 8  | H  | -0.4144930 | -0.8857800 | -1.8167620 |
| 9  | H  | -1.4500730 | -1.6426410 | 0.9765840  |
| 10 | Si | 0.9656780  | 0.0856020  | 0.0026780  |
| 11 | C  | 2.6985890  | -0.3987060 | -0.5418440 |
| 12 | H  | 2.7827490  | -0.3923080 | -1.6331890 |
| 13 | H  | 3.4425200  | 0.2989710  | -0.1449260 |
| 14 | H  | 2.9562460  | -1.4025900 | -0.1904830 |
| 15 | C  | 0.6049060  | 1.8369600  | -0.5734980 |
| 16 | H  | 0.6587370  | 1.9078870  | -1.6644040 |



|    |    |            |            |            |
|----|----|------------|------------|------------|
| 20 | C  | 1.5884520  | -0.4781880 | -0.6894700 |
| 21 | H  | -0.5831230 | -1.7430300 | 1.8872310  |
| 22 | H  | 0.7336530  | 0.3807430  | -0.8616840 |
| 23 | C  | 2.9172090  | 0.1867160  | -0.3591370 |
| 24 | H  | 3.1840850  | 0.8444840  | -1.1901620 |
| 25 | H  | 2.8023630  | 0.8253240  | 0.5216250  |
| 26 | H  | 1.5665480  | -1.0535610 | -1.6173740 |
| 27 | Si | 4.3300140  | -1.0469630 | -0.0530800 |
| 28 | C  | 3.8605660  | -2.1382630 | 1.4008130  |
| 29 | H  | 2.9774700  | -2.7474980 | 1.1833540  |
| 30 | H  | 4.6786240  | -2.8239760 | 1.6421740  |
| 31 | H  | 3.6490420  | -1.5399710 | 2.2921960  |
| 32 | C  | 4.5743270  | -2.0924930 | -1.5921050 |
| 33 | H  | 4.8044700  | -1.4675640 | -2.4602640 |
| 34 | H  | 5.4028180  | -2.7937540 | -1.4536170 |
| 35 | H  | 3.6801020  | -2.6790700 | -1.8241800 |
| 36 | C  | 5.8755840  | -0.0588090 | 0.3319540  |
| 37 | H  | 5.7320120  | 0.5651020  | 1.2190520  |
| 38 | H  | 6.7235160  | -0.7240030 | 0.5208260  |
| 39 | H  | 6.1407580  | 0.5960980  | -0.5032970 |

Energy = -4252.6042

Enthalpy = -4252.2876

Free Energy (1 M) = -4252.3731

# of imaginary frequencies: 1

HCCCH<sub>2</sub>CH<sub>2</sub>Si(CH<sub>3</sub>)<sub>3</sub> ene product

|    |    |            |            |            |
|----|----|------------|------------|------------|
| 1  | Se | 1.3714130  | -0.4634070 | -0.5995540 |
| 2  | N  | 1.0710420  | 0.9788850  | 0.5564660  |
| 3  | N  | 2.4834740  | -1.4522530 | 0.3316560  |
| 4  | S  | 0.2427350  | 2.3317660  | 0.0073640  |
| 5  | C  | 1.5489350  | 3.4931480  | -0.3007710 |
| 6  | O  | -0.5664670 | 2.8007820  | 1.1160350  |
| 7  | O  | -0.3783510 | 1.9860440  | -1.2610660 |
| 8  | S  | 4.0648430  | -1.0794660 | 0.0992410  |
| 9  | C  | 4.5008370  | -0.1016120 | 1.5261350  |
| 10 | O  | 4.2607930  | -0.2334710 | -1.0870420 |
| 11 | O  | 4.8230620  | -2.3230590 | 0.1709190  |
| 12 | H  | 5.5600630  | 0.1402440  | 1.4438070  |
| 13 | H  | 4.3068270  | -0.6944110 | 2.4180710  |
| 14 | H  | 3.8934410  | 0.8024840  | 1.5179300  |
| 15 | H  | 1.0788760  | 4.4047790  | -0.6682570 |
| 16 | H  | 2.2116340  | 3.0693970  | -1.0537050 |
| 17 | H  | 2.0738560  | 3.6721400  | 0.6353720  |
| 18 | C  | -0.2078970 | -1.5032450 | -0.2018880 |
| 19 | C  | -1.2155580 | -0.9450840 | 0.3925320  |
| 20 | C  | -2.1895350 | -0.3123060 | 0.9876120  |
| 21 | H  | -0.1413680 | -2.5180070 | -0.5756970 |
| 22 | H  | 0.7741940  | 0.6983460  | 1.4886300  |
| 23 | C  | -3.2822500 | 0.4285950  | 0.2886220  |
| 24 | H  | -3.5697390 | 1.2967410  | 0.8885220  |



|    |    |            |            |            |
|----|----|------------|------------|------------|
| 25 | H  | -2.9352990 | 0.7923520  | -0.6824470 |
| 26 | H  | -2.2232390 | -0.3690960 | 2.0740320  |
| 27 | Si | -4.8236940 | -0.6543870 | 0.0015000  |
| 28 | C  | -6.1555410 | 0.4345940  | -0.7444140 |
| 29 | H  | -7.0589110 | -0.1465950 | -0.9530800 |
| 30 | H  | -6.4271330 | 1.2462370  | -0.0629360 |
| 31 | H  | -5.8172850 | 0.8802770  | -1.6845720 |
| 32 | C  | -4.3502220 | -2.0321920 | -1.1794480 |
| 33 | H  | -3.5379180 | -2.6392180 | -0.7684290 |
| 34 | H  | -5.2014930 | -2.6929270 | -1.3690030 |
| 35 | H  | -4.0166840 | -1.6267750 | -2.1394790 |
| 36 | C  | -5.3902170 | -1.3650170 | 1.6430050  |
| 37 | H  | -4.6186510 | -2.0026060 | 2.0852470  |
| 38 | H  | -5.6237760 | -0.5698090 | 2.3574230  |
| 39 | H  | -6.2901970 | -1.9731820 | 1.5108110  |

Energy = -4252.6646

Enthalpy = -4252.3426

Free Energy (1 M) = -4252.4304

# of imaginary frequencies: 0

CH3CH2CCCH2OAc

|    |   |            |            |            |
|----|---|------------|------------|------------|
| 1  | C | 0.9388610  | -0.5173270 | -0.2084720 |
| 2  | C | -0.4444000 | -0.9157510 | 0.0031990  |
| 3  | H | -0.5754650 | -1.3639750 | 0.9908890  |
| 4  | H | -0.7592650 | -1.6481930 | -0.7438150 |
| 5  | C | 2.0892880  | -0.2167320 | -0.3853270 |
| 6  | C | 3.4899560  | 0.1574380  | -0.5742060 |
| 7  | H | 3.5311500  | 1.0257930  | -1.2387620 |
| 8  | H | 4.0012400  | -0.6560130 | -1.0979600 |
| 9  | C | 4.2102900  | 0.4692630  | 0.7421870  |
| 10 | H | 5.2492170  | 0.7422330  | 0.5455730  |
| 11 | H | 3.7282480  | 1.3004510  | 1.2612120  |
| 12 | H | 4.2021440  | -0.3988170 | 1.4047810  |
| 13 | O | -1.2779350 | 0.2541430  | -0.1000870 |
| 14 | C | -2.5925780 | 0.0559890  | 0.0722430  |
| 15 | O | -3.0676840 | -1.0299090 | 0.3015910  |
| 16 | C | -3.3583800 | 1.3387480  | -0.0586330 |
| 17 | H | -2.9955850 | 2.0611050  | 0.6748170  |
| 18 | H | -3.1967280 | 1.7631280  | -1.0513260 |
| 19 | H | -4.4182150 | 1.1506580  | 0.0966180  |

Energy = -423.1484

Enthalpy = -422.9796

Free Energy (1 M) = -423.0309

# of imaginary frequencies: 0

CH3CH2CCCH2OAc distal ene TS

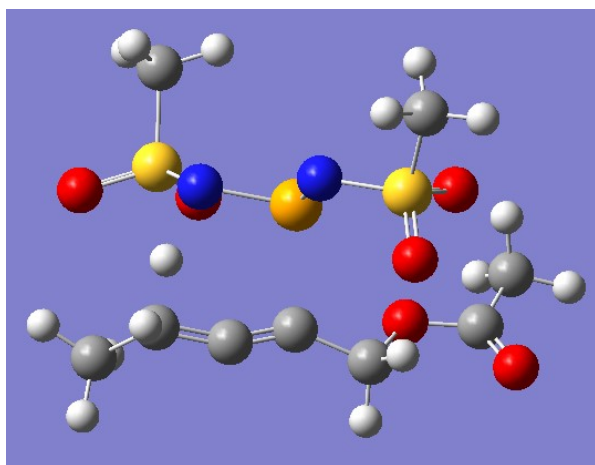

|    |    |            |            |            |
|----|----|------------|------------|------------|
| 1  | Se | 0.2489250  | -0.3686290 | -0.2954320 |
| 2  | N  | 1.9144680  | -0.7080080 | 0.1544240  |
| 3  | N  | -0.4756310 | -1.6714400 | 0.6067320  |
| 4  | S  | 3.0707690  | -0.1888670 | -0.9405230 |
| 5  | C  | 3.3455540  | -1.6196630 | -1.9619950 |
| 6  | O  | 4.2690510  | 0.0531660  | -0.1555520 |
| 7  | O  | 2.5508370  | 0.8913190  | -1.7752490 |
| 8  | S  | -2.1160850 | -1.6855580 | 0.5757500  |
| 9  | C  | -2.4406770 | -3.4316460 | 0.5258040  |
| 10 | O  | -2.6316390 | -1.0619020 | -0.6525380 |
| 11 | O  | -2.6555170 | -1.1553890 | 1.8278400  |
| 12 | H  | -3.5241160 | -3.5454370 | 0.5540910  |
| 13 | H  | -1.9816750 | -3.8909730 | 1.3990540  |
| 14 | H  | -2.0285250 | -3.8339920 | -0.3970760 |
| 15 | H  | 4.1628820  | -1.3650780 | -2.6362710 |
| 16 | H  | 2.4369250  | -1.8314300 | -2.5227420 |
| 17 | H  | 3.6176130  | -2.4516940 | -1.3159190 |
| 18 | C  | -0.1697780 | 1.3436360  | 1.0889180  |
| 19 | C  | 0.8056220  | 1.3144710  | 1.8682510  |
| 20 | C  | 2.0234030  | 0.9150710  | 2.3833710  |
| 21 | H  | 2.1327260  | 0.0804860  | 1.4630940  |
| 22 | C  | 3.2169340  | 1.8570440  | 2.3361430  |
| 23 | H  | 3.1600070  | 2.5682480  | 3.1623040  |
| 24 | H  | 3.2443930  | 2.4072970  | 1.3954270  |
| 25 | H  | 1.9468650  | 0.2962560  | 3.2786540  |
| 26 | H  | 4.1381850  | 1.2835110  | 2.4286520  |
| 27 | C  | -1.5120120 | 1.9235470  | 0.8429250  |
| 28 | H  | -2.2724860 | 1.3118020  | 1.3348730  |
| 29 | H  | -1.5542240 | 2.9381100  | 1.2422330  |
| 30 | O  | -1.7225750 | 1.9287400  | -0.5659960 |
| 31 | C  | -3.0059690 | 2.0231000  | -0.9779010 |
| 32 | O  | -3.9141650 | 2.2283490  | -0.2157250 |
| 33 | C  | -3.1085700 | 1.8210510  | -2.4556890 |
| 34 | H  | -2.3266590 | 2.3745320  | -2.9761940 |
| 35 | H  | -2.9648000 | 0.7563670  | -2.6554020 |
| 36 | H  | -4.0923250 | 2.1283760  | -2.8030150 |

Energy = -4111.1137

Enthalpy = -4110.8282

Free Energy (1 M) = -4110.9091

# of imaginary frequencies: 1

CH3CH2CCCH2OAc distal ene product

|    |    |            |            |            |
|----|----|------------|------------|------------|
| 1  | Se | -0.0120040 | 0.1096320  | 0.2291820  |
| 2  | N  | 1.5939770  | 0.8004760  | -0.4280640 |
| 3  | N  | -1.1740080 | 0.7768030  | -0.9024500 |
| 4  | S  | 3.0001060  | 0.6690250  | 0.4735360  |
| 5  | C  | 3.2517030  | 2.3223010  | 1.0696070  |
| 6  | O  | 4.0687610  | 0.3282430  | -0.4461880 |
| 7  | O  | 2.7005210  | -0.1946940 | 1.6038960  |
| 8  | S  | -1.8905190 | 2.1600710  | -0.3935930 |
| 9  | C  | -1.0505570 | 3.4524120  | -1.2915010 |
| 10 | O  | -1.6614840 | 2.3990530  | 1.0389070  |
| 11 | O  | -3.2731010 | 2.1316620  | -0.8562020 |
| 12 | H  | -1.5192160 | 4.3974400  | -1.0186080 |
| 13 | H  | -1.1649200 | 3.2569290  | -2.3561140 |
| 14 | H  | -0.0001540 | 3.4420400  | -1.0034440 |
| 15 | H  | 4.1555720  | 2.3041850  | 1.6777630  |
| 16 | H  | 2.3869300  | 2.6044670  | 1.6678180  |
| 17 | H  | 3.3726380  | 2.9793170  | 0.2104510  |
| 18 | C  | 0.0569050  | -1.6526820 | -0.6047370 |
| 19 | C  | 1.2124550  | -2.1247890 | -0.9554580 |
| 20 | C  | 2.3999990  | -2.5325640 | -1.3011930 |
| 21 | H  | 1.7394090  | 0.6577150  | -1.4243110 |
| 22 | C  | 3.3582430  | -3.2382480 | -0.3901200 |
| 23 | H  | 3.6567190  | -4.1939780 | -0.8277560 |
| 24 | H  | 2.9235800  | -3.4120210 | 0.5936610  |
| 25 | H  | 2.7211760  | -2.3359170 | -2.3221210 |
| 26 | H  | 4.2580510  | -2.6278420 | -0.2769650 |
| 27 | C  | -1.2969220 | -2.2860370 | -0.7071890 |
| 28 | H  | -1.8701580 | -1.8445430 | -1.5234890 |
| 29 | H  | -1.2074280 | -3.3620170 | -0.8605610 |
| 30 | O  | -1.9548870 | -2.0061640 | 0.5352690  |
| 31 | C  | -3.3016530 | -2.0989410 | 0.5494460  |
| 32 | O  | -3.9302980 | -2.5123350 | -0.3897040 |
| 33 | C  | -3.8590160 | -1.6121610 | 1.8504530  |
| 34 | H  | -3.3353950 | -2.0791650 | 2.6855750  |
| 35 | H  | -3.7015660 | -0.5328350 | 1.9174530  |
| 36 | H  | -4.9233130 | -1.8296240 | 1.8993060  |

Energy = -4111.1734

Enthalpy = -4110.8830

Free Energy (1 M) = -4110.9678

# of imaginary frequencies: 0

CH3CH2CCCH2OAc proximal ene TS

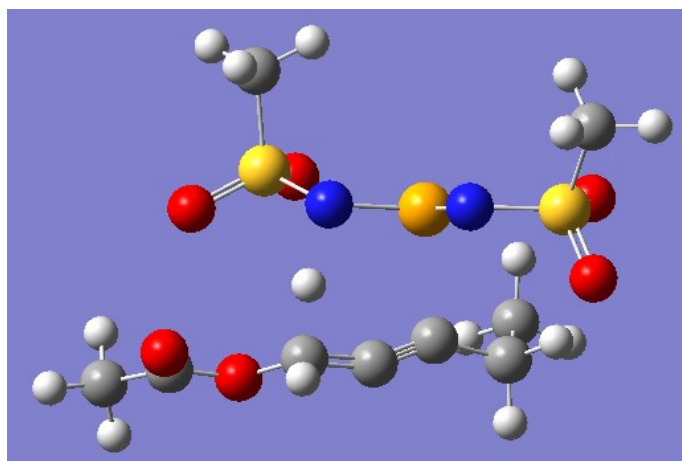

|    |    |            |            |            |
|----|----|------------|------------|------------|
| 1  | Se | -0.8418010 | 0.4641850  | 0.3575610  |
| 2  | N  | 0.6657080  | 0.9369260  | -0.4129520 |
| 3  | N  | -1.7999970 | 0.4024230  | -1.0950540 |
| 4  | S  | 1.7693740  | 1.7042500  | 0.5990290  |
| 5  | C  | 1.4769320  | 3.4264420  | 0.2672140  |
| 6  | O  | 3.0837990  | 1.3526510  | 0.0917550  |
| 7  | O  | 1.4594200  | 1.4294890  | 1.9986540  |
| 8  | S  | -3.3689320 | -0.0054550 | -0.8260990 |
| 9  | C  | -4.2472250 | 1.3206300  | -1.6207360 |
| 10 | O  | -3.6694750 | 0.0211870  | 0.6153350  |
| 11 | O  | -3.6837200 | -1.2435000 | -1.5300520 |
| 12 | H  | -5.3087990 | 1.0899980  | -1.5352870 |
| 13 | H  | -3.9423360 | 1.3544420  | -2.6649580 |
| 14 | H  | -4.0063610 | 2.2497650  | -1.1083510 |
| 15 | H  | 2.2227360  | 3.9793740  | 0.8379580  |
| 16 | H  | 0.4711430  | 3.6817940  | 0.5964670  |
| 17 | H  | 1.6012920  | 3.5914530  | -0.8009950 |
| 18 | C  | -0.4545700 | -1.7861820 | 0.6393430  |
| 19 | C  | 0.5617020  | -1.9229540 | -0.0676440 |
| 20 | C  | 1.6112280  | -1.5502170 | -0.8881450 |
| 21 | H  | 1.2598040  | -0.3285360 | -0.8700510 |
| 22 | H  | 1.5771360  | -1.8418060 | -1.9363480 |
| 23 | O  | 2.8767450  | -1.6492320 | -0.2937970 |
| 24 | C  | 3.9214660  | -1.2223310 | -1.0513910 |
| 25 | O  | 3.7876580  | -0.8792250 | -2.1949030 |
| 26 | C  | 5.1895100  | -1.2440670 | -0.2623230 |
| 27 | H  | 6.0377790  | -1.0990190 | -0.9272140 |
| 28 | H  | 5.1456190  | -0.4279490 | 0.4624230  |
| 29 | H  | 5.2861010  | -2.1817670 | 0.2855760  |
| 30 | C  | -1.5209630 | -2.4191240 | 1.4514880  |
| 31 | H  | -2.4765260 | -2.2770640 | 0.9401360  |
| 32 | H  | -1.3150030 | -3.4915480 | 1.4555040  |
| 33 | C  | -1.5972180 | -1.8767210 | 2.8792190  |
| 34 | H  | -2.3503590 | -2.4364790 | 3.4354510  |
| 35 | H  | -0.6389930 | -1.9801450 | 3.3916340  |
| 36 | H  | -1.8896480 | -0.8247490 | 2.8920660  |

Energy = -4111.1079

Enthalpy = -4110.8232

Free Energy (1 M) = -4110.9049

# of imaginary frequencies: 1

CH3CH2CCCH2OAc proximal ene product

|    |    |            |            |            |
|----|----|------------|------------|------------|
| 1  | Se | -1.0047700 | 0.3156600  | -0.4621870 |
| 2  | N  | -0.0479080 | -1.0659020 | 0.3464620  |
| 3  | N  | -2.2711000 | 0.6173250  | 0.7120060  |
| 4  | S  | 1.1430060  | -1.8747000 | -0.5160520 |
| 5  | C  | 0.4275550  | -3.4781850 | -0.7732430 |
| 6  | O  | 2.2992220  | -2.0020860 | 0.3500620  |
| 7  | O  | 1.2568370  | -1.1985650 | -1.7976110 |
| 8  | S  | -3.6534120 | -0.2264400 | 0.4447030  |
| 9  | C  | -3.5770140 | -1.5793540 | 1.6048430  |
| 10 | O  | -3.6877670 | -0.8057330 | -0.9054190 |
| 11 | O  | -4.7668200 | 0.6281670  | 0.8393230  |
| 12 | H  | -4.4961680 | -2.1540610 | 1.4954470  |
| 13 | H  | -3.4968270 | -1.1640250 | 2.6076970  |
| 14 | H  | -2.7069760 | -2.1885700 | 1.3634980  |
| 15 | H  | 1.1532840  | -4.0595040 | -1.3411790 |
| 16 | H  | -0.4957980 | -3.3507040 | -1.3355680 |
| 17 | H  | 0.2426260  | -3.9290080 | 0.1999760  |
| 18 | C  | 0.1031960  | 1.8447480  | 0.0962330  |
| 19 | C  | 1.2936110  | 1.5574960  | 0.5134320  |
| 20 | C  | 2.4527830  | 1.1819770  | 0.9807100  |
| 21 | H  | 0.2032730  | -0.8894000 | 1.3163030  |
| 22 | H  | 2.6323050  | 0.9865690  | 2.0313460  |
| 23 | O  | 3.5164300  | 1.0135580  | 0.1380810  |
| 24 | C  | 4.6578970  | 0.4707750  | 0.6637730  |
| 25 | O  | 4.7756900  | 0.2172820  | 1.8293350  |
| 26 | C  | 5.6694610  | 0.2558990  | -0.4135830 |
| 27 | H  | 5.2899630  | -0.4961350 | -1.1089640 |
| 28 | H  | 5.8225250  | 1.1800580  | -0.9727780 |
| 29 | H  | 6.6048850  | -0.0829520 | 0.0247540  |
| 30 | C  | -0.5579570 | 3.1840010  | -0.0801090 |
| 31 | H  | -1.4430330 | 3.2125100  | 0.5615020  |
| 32 | H  | 0.1409450  | 3.9375000  | 0.2878370  |
| 33 | C  | -0.9489270 | 3.4807120  | -1.5294800 |
| 34 | H  | -1.3707410 | 4.4846600  | -1.5985960 |
| 35 | H  | -0.0815270 | 3.4234860  | -2.1906850 |
| 36 | H  | -1.7093750 | 2.7860250  | -1.8995330 |

Energy = -4111.1656

Enthalpy = -4110.8754

Free Energy (1 M) = -4110.9596

# of imaginary frequencies: 0

CH3CH2CCCH2CH2OAc

|   |   |           |            |            |
|---|---|-----------|------------|------------|
| 1 | C | 2.7665830 | -0.5264750 | -0.1974540 |
| 2 | C | 1.6187250 | -0.8535530 | -0.0459370 |

|    |   |            |            |            |
|----|---|------------|------------|------------|
| 3  | C | 0.2155350  | -1.2257300 | 0.1276290  |
| 4  | H | 0.0577130  | -1.6275190 | 1.1327110  |
| 5  | H | -0.0507090 | -2.0147910 | -0.5816450 |
| 6  | C | 4.1613180  | -0.1136710 | -0.3608990 |
| 7  | H | 4.8114710  | -0.9412790 | -0.0607970 |
| 8  | H | 4.3569430  | 0.0637630  | -1.4228740 |
| 9  | C | -0.6995580 | -0.0275070 | -0.0851680 |
| 10 | H | -0.5953190 | 0.3761280  | -1.0943520 |
| 11 | H | -0.4842650 | 0.7670930  | 0.6320960  |
| 12 | O | -2.0426520 | -0.4937530 | 0.1068770  |
| 13 | C | -3.0223760 | 0.4076320  | -0.0328100 |
| 14 | O | -2.8164820 | 1.5654920  | -0.3073570 |
| 15 | C | -4.3706800 | -0.2097940 | 0.1943570  |
| 16 | H | -4.5280680 | -1.0229060 | -0.5168660 |
| 17 | H | -4.4168460 | -0.6338790 | 1.1992310  |
| 18 | H | -5.1453120 | 0.5439610  | 0.0736890  |
| 19 | C | 4.5091200  | 1.1407170  | 0.4486600  |
| 20 | H | 5.5565030  | 1.4096200  | 0.2950090  |
| 21 | H | 3.8885790  | 1.9854670  | 0.1415210  |
| 22 | H | 4.3503850  | 0.9707190  | 1.5158470  |

Energy = -462.2809

Enthalpy = -462.2676

Free Energy (1 M) = -462.3228

# of imaginary frequencies: 0

CH3CH2CCCH2CH2OAc distal ene TS

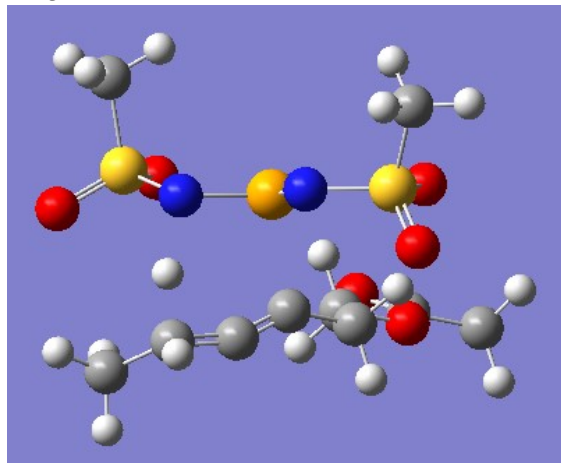

|    |    |            |            |            |
|----|----|------------|------------|------------|
| 1  | Se | -0.7400550 | 0.4025210  | -0.4014090 |
| 2  | N  | -2.1912260 | -0.5372590 | -0.0676730 |
| 3  | N  | -1.3933760 | 1.9323430  | 0.1292320  |
| 4  | S  | -2.3019680 | -1.9839040 | -0.9056080 |
| 5  | C  | -3.2960600 | -1.5658460 | -2.3206720 |
| 6  | O  | -3.0675070 | -2.8769090 | -0.0532470 |
| 7  | O  | -0.9838550 | -2.4141380 | -1.3670730 |
| 8  | S  | -0.3363360 | 3.1800250  | 0.0235490  |
| 9  | C  | -1.1763760 | 4.3274540  | -1.0463710 |
| 10 | O  | 0.9095490  | 2.7524460  | -0.6383880 |

|    |   |            |            |            |
|----|---|------------|------------|------------|
| 11 | O | -0.1958500 | 3.8115830  | 1.3304110  |
| 12 | H | -0.5494190 | 5.2163940  | -1.1110150 |
| 13 | H | -2.1399270 | 4.5666250  | -0.6002040 |
| 14 | H | -1.2989370 | 3.8638170  | -2.0230740 |
| 15 | H | -3.4619930 | -2.4946380 | -2.8661140 |
| 16 | H | -2.7520760 | -0.8504330 | -2.9347230 |
| 17 | H | -4.2360510 | -1.1498690 | -1.9640150 |
| 18 | C | 0.5141790  | -0.1559220 | 1.3619160  |
| 19 | C | -0.3612930 | -0.5927500 | 2.1415410  |
| 20 | C | -1.5985330 | -1.0349540 | 2.5634300  |
| 21 | H | -2.0709080 | -0.8320310 | 1.4136570  |
| 22 | H | -2.1322120 | -0.3339750 | 3.2063040  |
| 23 | C | -1.8040380 | -2.5080100 | 2.8902960  |
| 24 | H | -1.4471970 | -2.7143850 | 3.9011070  |
| 25 | H | -2.8647480 | -2.7497180 | 2.8361140  |
| 26 | H | -1.2683050 | -3.1447680 | 2.1864670  |
| 27 | C | 1.9496650  | 0.1656310  | 1.1707180  |
| 28 | H | 2.0494300  | 1.1267630  | 0.6607690  |
| 29 | H | 2.4143140  | 0.2535530  | 2.1544710  |
| 30 | C | 2.6405800  | -0.9240670 | 0.3601030  |
| 31 | H | 2.6043880  | -1.8856170 | 0.8763690  |
| 32 | H | 2.1855010  | -1.0445460 | -0.6259960 |
| 33 | O | 3.9990720  | -0.5040700 | 0.2116680  |
| 34 | C | 4.8032030  | -1.3067350 | -0.5018670 |
| 35 | O | 4.4226430  | -2.3380350 | -0.9991500 |
| 36 | C | 6.1916810  | -0.7481850 | -0.5903350 |
| 37 | H | 6.1649470  | 0.2134620  | -1.1068240 |
| 38 | H | 6.5875250  | -0.5759890 | 0.4120100  |
| 39 | H | 6.8321350  | -1.4406160 | -1.1316670 |

Energy = -4150.4314

Enthalpy = -4150.1159

Free Energy (1 M) = -4150.2022

# of imaginary frequencies: 1

CH3CH2CCCH2CH2OAc distal ene product

|    |    |            |            |            |
|----|----|------------|------------|------------|
| 1  | Se | 0.4013000  | 0.3106120  | 0.1844600  |
| 2  | N  | 2.1457360  | -0.1118100 | -0.3296950 |
| 3  | N  | 0.0272860  | 1.6669810  | -0.8607160 |
| 4  | S  | 3.0655640  | -1.1658800 | 0.5958430  |
| 5  | C  | 4.1943390  | -0.0805750 | 1.4319460  |
| 6  | O  | 3.8055400  | -2.0050750 | -0.3270680 |
| 7  | O  | 2.1765920  | -1.7612200 | 1.5795670  |
| 8  | S  | 0.3679110  | 3.1354240  | -0.2145060 |
| 9  | C  | 1.9178730  | 3.5996750  | -0.9660450 |
| 10 | O  | 0.5888300  | 3.0590700  | 1.2362600  |
| 11 | O  | -0.6485750 | 4.0654720  | -0.6920200 |
| 12 | H  | 2.1742340  | 4.5925710  | -0.5976110 |
| 13 | H  | 1.7832960  | 3.6099740  | -2.0460480 |
| 14 | H  | 2.6715590  | 2.8697140  | -0.6733380 |
| 15 | H  | 4.8240820  | -0.7072770 | 2.0627650  |

|    |   |            |            |            |
|----|---|------------|------------|------------|
| 16 | H | 3.6139580  | 0.6164840  | 2.0342360  |
| 17 | H | 4.7869850  | 0.4389840  | 0.6816240  |
| 18 | C | -0.5679210 | -1.0140880 | -0.8822440 |
| 19 | C | 0.1030500  | -2.0722800 | -1.2241880 |
| 20 | C | 0.8223440  | -3.1057530 | -1.5573610 |
| 21 | H | 2.2662510  | -0.2473660 | -1.3305180 |
| 22 | H | 1.3409820  | -3.0717750 | -2.5133730 |
| 23 | C | 1.0002740  | -4.3295230 | -0.7093630 |
| 24 | H | 2.0577260  | -4.4386490 | -0.4543750 |
| 25 | H | 0.4209070  | -4.2671970 | 0.2113120  |
| 26 | H | 0.6983540  | -5.2200010 | -1.2662730 |
| 27 | C | -2.0169310 | -0.7009650 | -1.1433930 |
| 28 | H | -2.1096710 | 0.3319130  | -1.4875280 |
| 29 | H | -2.3617220 | -1.3567100 | -1.9449040 |
| 30 | C | -2.8769720 | -0.9123520 | 0.0938440  |
| 31 | H | -2.8429590 | -1.9526020 | 0.4252310  |
| 32 | H | -2.5642540 | -0.2767850 | 0.9278860  |
| 33 | O | -4.2158750 | -0.5676490 | -0.2766180 |
| 34 | C | -5.1524090 | -0.6731330 | 0.6768390  |
| 35 | O | -4.9062230 | -1.0459220 | 1.7981430  |
| 36 | C | -6.5019130 | -0.2686450 | 0.1632410  |
| 37 | H | -6.4758720 | 0.7795190  | -0.1416340 |
| 38 | H | -6.7588910 | -0.8637330 | -0.7148020 |
| 39 | H | -7.2486550 | -0.4083300 | 0.9414180  |

Energy = -4150.4876

Enthalpy = -4150.1670

Free Energy (1 M) = -4150.2549

# of imaginary frequencies: 0

CH3CH2CCCH2CH2OAc proximal ene TS

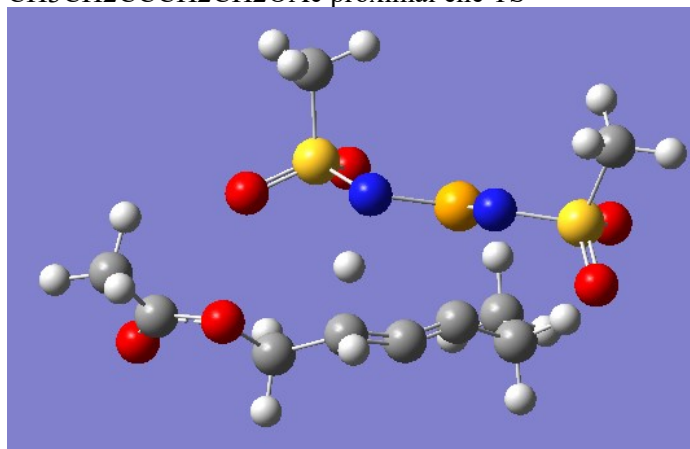

|   |    |            |           |            |
|---|----|------------|-----------|------------|
| 1 | Se | -1.1607620 | 0.4804370 | 0.3665370  |
| 2 | N  | 0.4195400  | 0.9341430 | -0.2731630 |
| 3 | N  | -1.9476360 | 0.3918580 | -1.1890150 |
| 4 | S  | 1.4464320  | 1.6386410 | 0.8537410  |
| 5 | C  | 1.2835890  | 3.3751540 | 0.5087220  |
| 6 | O  | 2.7900630  | 1.2181810 | 0.4972450  |
| 7 | O  | 0.9683240  | 1.3788570 | 2.2096150  |



|    |   |            |            |            |
|----|---|------------|------------|------------|
| 8  | S | -3.5209740 | -0.0629590 | -1.1083870 |
| 9  | C | -4.3773610 | 1.3169910  | -1.8359690 |
| 10 | O | -3.9513260 | -0.1900650 | 0.2954130  |
| 11 | O | -3.7347340 | -1.2222780 | -1.9661500 |
| 12 | H | -5.4338690 | 1.0522690  | -1.8689320 |
| 13 | H | -3.9863890 | 1.4697280  | -2.8401700 |
| 14 | H | -4.2134970 | 2.1932290  | -1.2117140 |
| 15 | H | 1.9825840  | 3.8884250  | 1.1685640  |
| 16 | H | 0.2592450  | 3.6767550  | 0.7197370  |
| 17 | H | 1.5393410  | 3.5389630  | -0.5360780 |
| 18 | C | -0.8075870 | -1.6910000 | 0.8075680  |
| 19 | C | 0.1491430  | -1.8970510 | 0.0306660  |
| 20 | C | 1.1682470  | -1.6094230 | -0.8520350 |
| 21 | H | 0.9513250  | -0.3517700 | -0.7453670 |
| 22 | C | 2.6024070  | -1.8113150 | -0.4021670 |
| 23 | H | 2.8814480  | -2.8659240 | -0.4550860 |
| 24 | H | 2.7527860  | -1.4523040 | 0.6164100  |
| 25 | H | 0.9752030  | -1.8659970 | -1.8938480 |
| 26 | O | 3.4051520  | -1.0582740 | -1.3090960 |
| 27 | C | 4.6661960  | -0.8088880 | -0.9275010 |
| 28 | O | 5.1563880  | -1.2854470 | 0.0665400  |
| 29 | C | 5.3426590  | 0.1348560  | -1.8737220 |
| 30 | H | 5.1256720  | -0.1329990 | -2.9080540 |
| 31 | H | 4.9461320  | 1.1372030  | -1.6937440 |
| 32 | H | 6.4156110  | 0.1325830  | -1.6949060 |
| 33 | C | -1.7731970 | -2.2262170 | 1.7989860  |
| 34 | H | -2.7807630 | -1.9211370 | 1.5063510  |
| 35 | H | -1.7283050 | -3.3154440 | 1.7355540  |
| 36 | C | -1.4603580 | -1.7537470 | 3.2213330  |
| 37 | H | -2.1855350 | -2.1833750 | 3.9142690  |
| 38 | H | -0.4597860 | -2.0659620 | 3.5260730  |
| 39 | H | -1.5193400 | -0.6659700 | 3.3044470  |

Energy = -4150.4312

Enthalpy = -4150.1169

Free Energy (1 M) = -4150.1989

# of imaginary frequencies: 1

CH3CH2CCCH2CH2OAc proximal ene product

|    |    |            |            |            |
|----|----|------------|------------|------------|
| 1  | Se | -1.1338080 | 0.3879420  | -0.3561760 |
| 2  | N  | -0.1699000 | -0.9119480 | 0.5740610  |
| 3  | N  | -2.6126500 | 0.5068410  | 0.5779230  |
| 4  | S  | 1.1019450  | -1.7219310 | -0.1664050 |
| 5  | C  | 0.2691070  | -3.0486280 | -1.0014100 |
| 6  | O  | 1.9052080  | -2.2548130 | 0.9178040  |
| 7  | O  | 1.7055490  | -0.8523650 | -1.1619730 |
| 8  | S  | -3.7720400 | -0.5597160 | 0.1191510  |
| 9  | C  | -3.6576870 | -1.8741910 | 1.3193900  |
| 10 | O  | -3.4827600 | -1.1441680 | -1.1987410 |
| 11 | O  | -5.0633290 | 0.0924160  | 0.2986170  |
| 12 | H  | -4.4310860 | -2.6031280 | 1.0794590  |

|    |   |            |            |            |
|----|---|------------|------------|------------|
| 13 | H | -3.8193490 | -1.4482300 | 2.3078170  |
| 14 | H | -2.6657820 | -2.3183770 | 1.2432660  |
| 15 | H | 1.0363570  | -3.6200400 | -1.5228930 |
| 16 | H | -0.4386310 | -2.6224040 | -1.7113430 |
| 17 | H | -0.2367350 | -3.6563710 | -0.2542360 |
| 18 | C | -0.3193390 | 2.0038140  | 0.3719330  |
| 19 | C | 0.8561990  | 1.8612200  | 0.9016480  |
| 20 | C | 2.0432410  | 1.6964520  | 1.4100230  |
| 21 | H | 0.0245700  | -0.6907060 | 1.5479860  |
| 22 | C | 3.2846420  | 1.7350400  | 0.5673960  |
| 23 | H | 3.9345890  | 2.5609930  | 0.8685250  |
| 24 | H | 3.0428980  | 1.8362470  | -0.4897380 |
| 25 | H | 2.1559300  | 1.5165570  | 2.4759500  |
| 26 | O | 3.9680390  | 0.4983590  | 0.7992570  |
| 27 | C | 4.7683150  | 0.0432850  | -0.1766560 |
| 28 | O | 5.0078350  | 0.6700920  | -1.1795860 |
| 29 | C | 5.2968690  | -1.3180730 | 0.1590090  |
| 30 | H | 5.8616040  | -1.2747110 | 1.0924520  |
| 31 | H | 4.4561990  | -1.9984290 | 0.3100030  |
| 32 | H | 5.9361800  | -1.6745840 | -0.6453810 |
| 33 | C | -1.1135830 | 3.2665990  | 0.1631800  |
| 34 | H | -2.0681750 | 3.1609240  | 0.6852780  |
| 35 | H | -0.5611250 | 4.0738550  | 0.6482510  |
| 36 | C | -1.3519790 | 3.5964780  | -1.3113260 |
| 37 | H | -1.9667720 | 2.8377070  | -1.8054520 |
| 38 | H | -1.8835330 | 4.5457760  | -1.3963710 |
| 39 | H | -0.4073500 | 3.6788360  | -1.8535650 |

Energy = -4150.4850

Enthalpy = -4150.1655

Free Energy (1 M) = -4150.2495

# of imaginary frequencies: 0

#### References:

1. Grünberg, M. F; Gooßen, L. J. Decarboxylative allylation of arylglyoxylic acid with allyl alcohol. *J. Organomet. Chem.* **2013**, *744*, 140-143.
2. Nishimura, T.; Guo, X.-X.; Uchiyama, N.; Katoh, T.; Hayashi, T. Steric Tuning of Silylacetylenes and Chiral Phosphine Ligands for Rhodium-Catalyzed Asymmetric Conjugate Alkynylation of Enones. *J. Am. Chem. Soc.* **2008**, *130*, 1576-1577.
